# Supplementary material for: A Novel Prognostic Ferroptosis-Related lncRNA Signature Associated with Immune Landscape in Invasive Breast Cancer
Source: PubMed Central journal article supplement (PMC8961446; doi:10.1155/2022/9168556), 2022-03-20

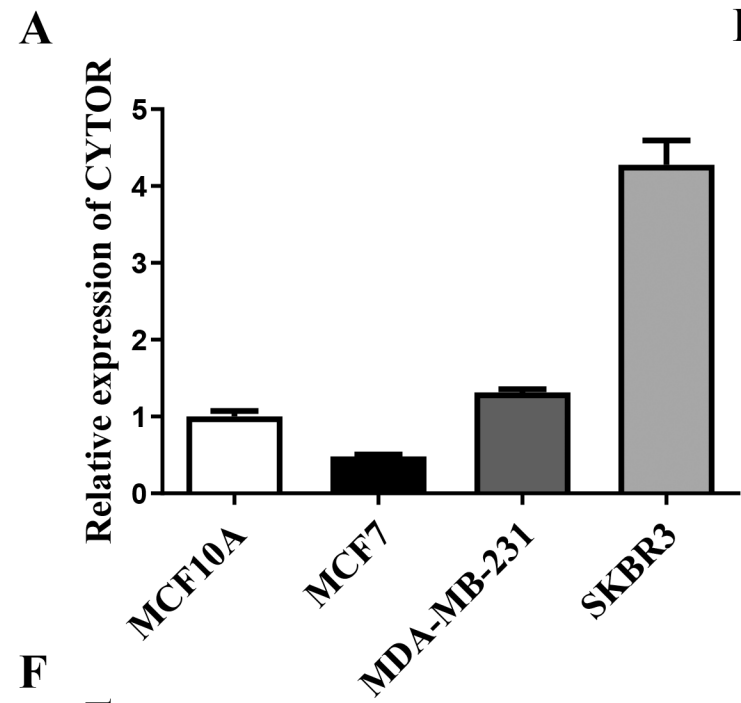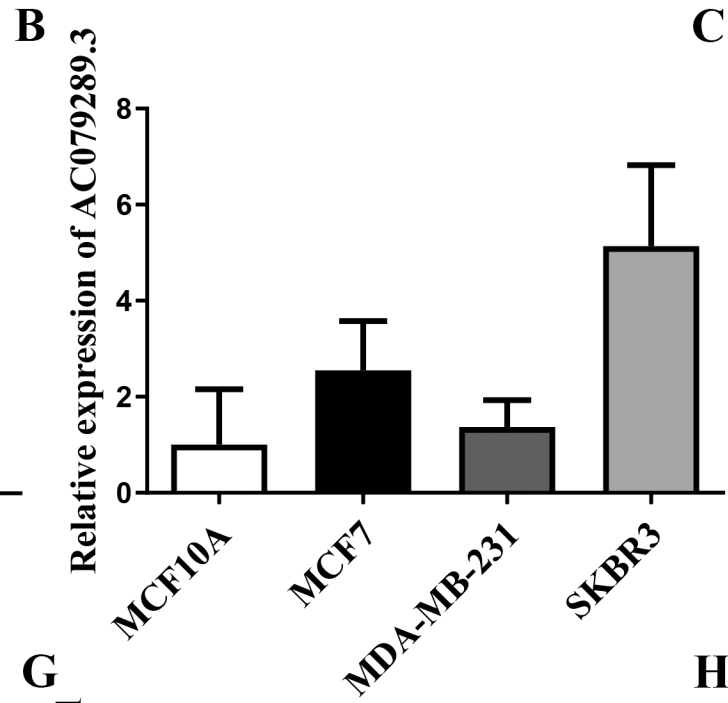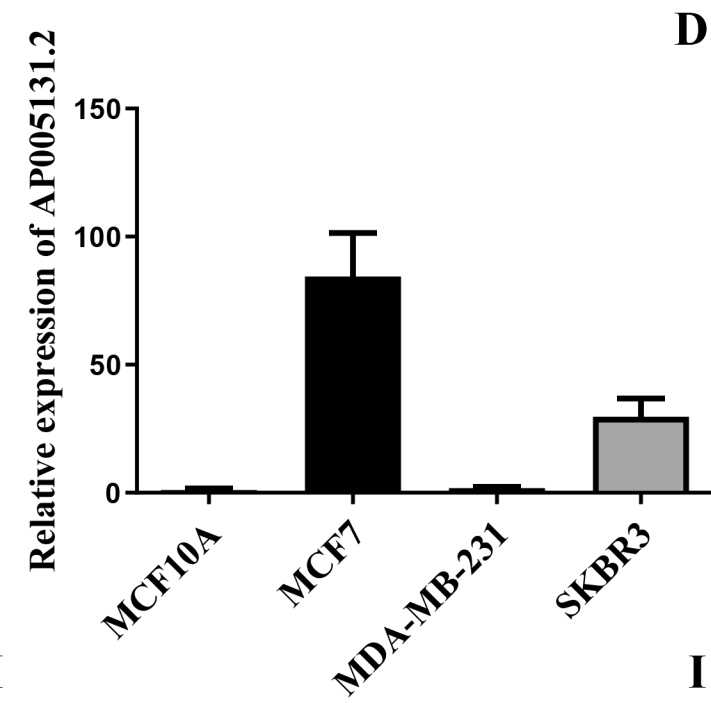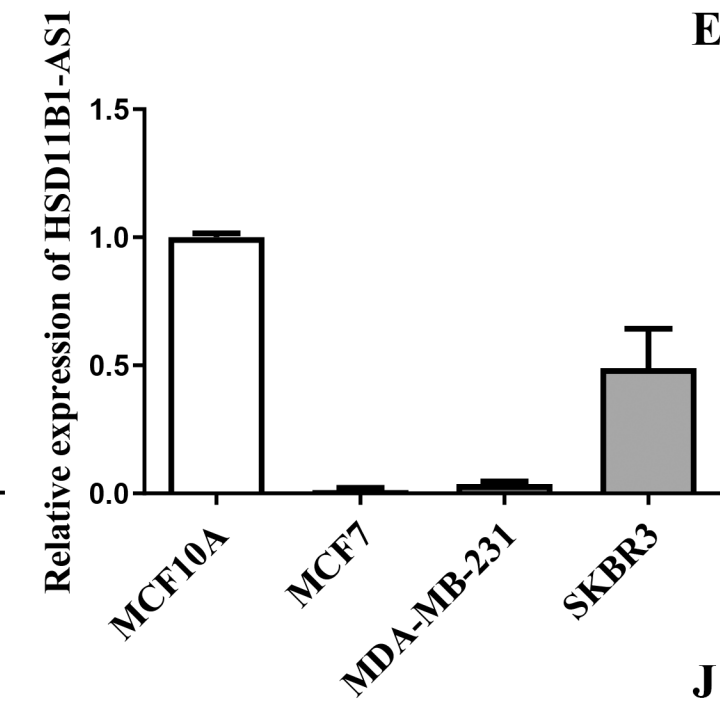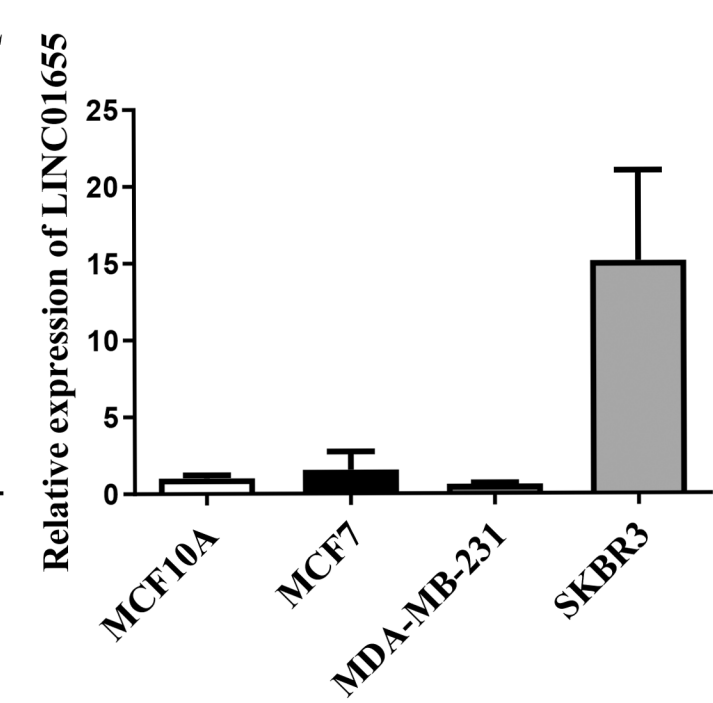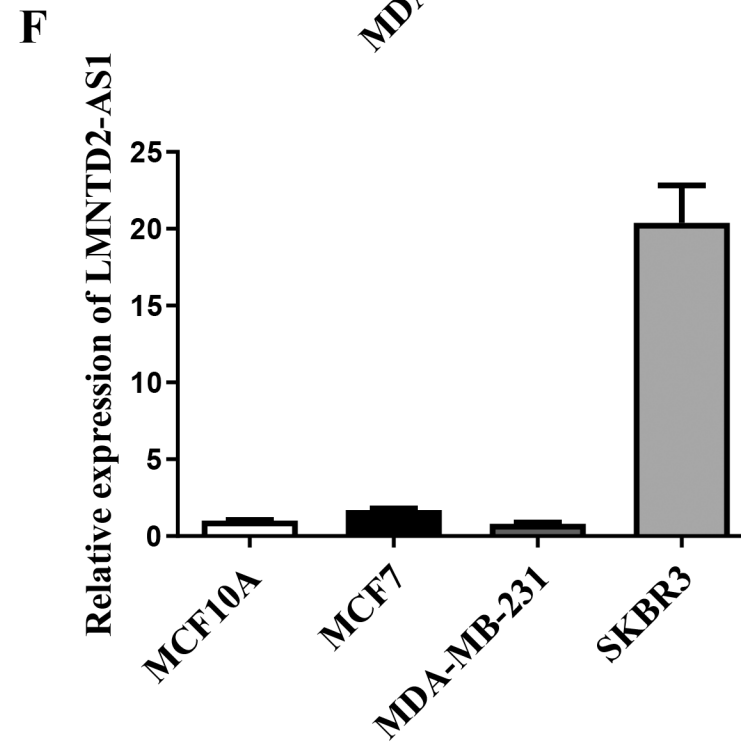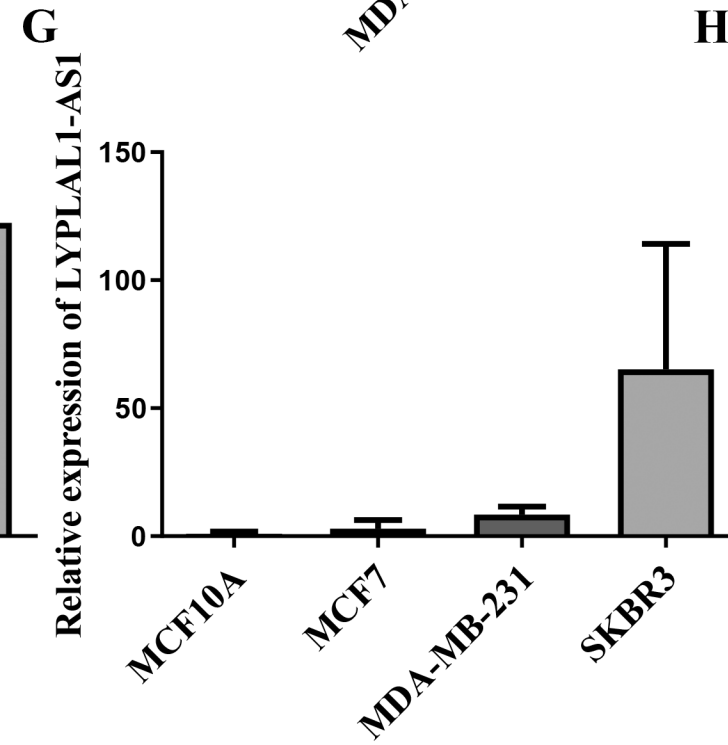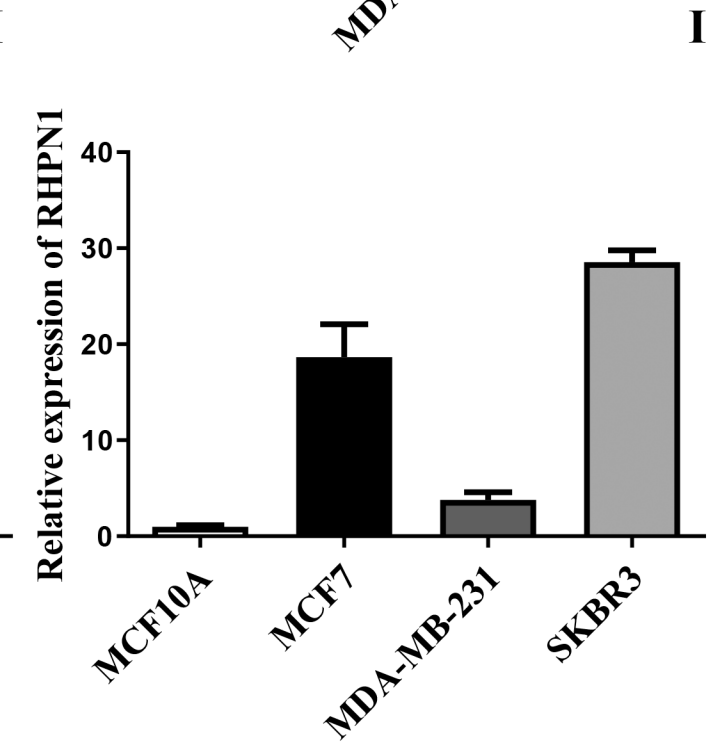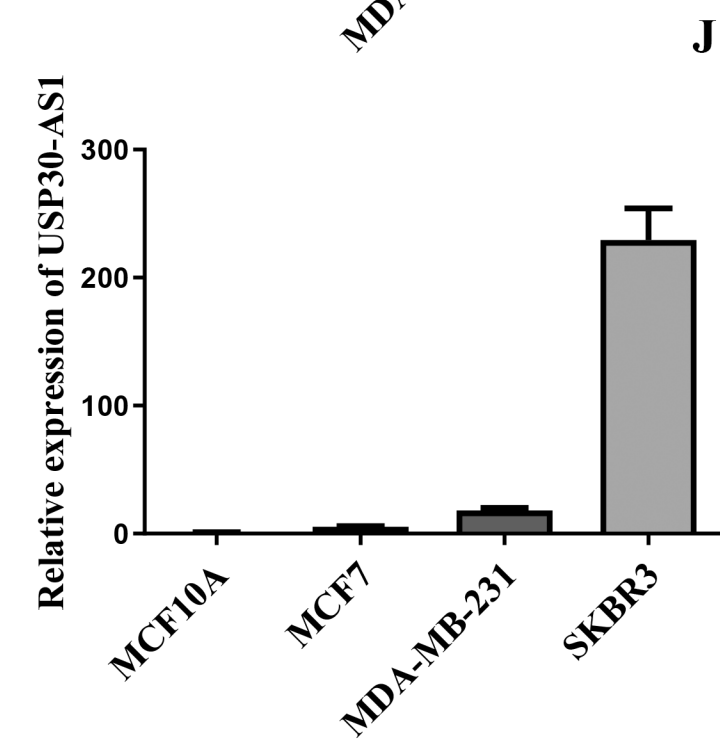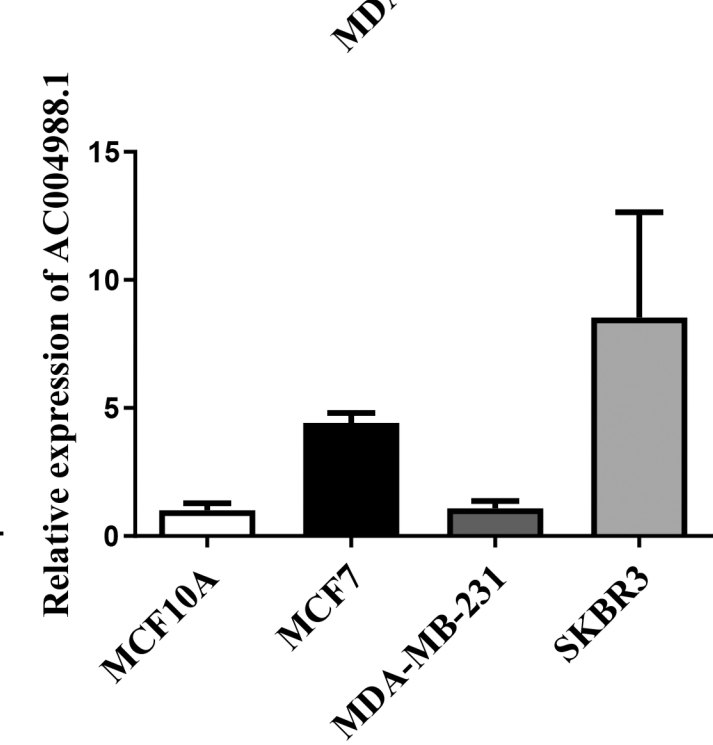

Supplement: 9168556.f5.pdf [file 9168556.f5.pdf]
