# Supplementary material for: A Novel Prognostic Ferroptosis-Related lncRNA Signature Associated with Immune Landscape in Invasive Breast Cancer
Source: PubMed Central journal article supplement (PMC8961446; doi:10.1155/2022/9168556), 2022-03-20
Supplement: 9168556.f6.pdf [file 9168556.f6.pdf]

Table S1: Ferroptosis-related genes were identified from FerDb (<http://www.zhounan.org>)

| Symbol  | Name        | HGNC_ID  | Evidence    | Test method  | Test in   | Test setting | Pathway | Confidence        |
|---------|-------------|----------|-------------|--------------|-----------|--------------|---------|-------------------|
| RPL8    | Ribosomal   | HGNC:103 | Required    | shRNA scr    | Human     | NRAS mut     | RPL8    | +: F Validated    |
| IREB2   | Iron respo  | HGNC:611 | Required    | shRNA scr    | Human     | NRAS mut     | IREB2   | +: F Validated    |
| ATP5MC3 | ATP synth   | HGNC:843 | Required    | shRNA scr    | Human     | NRAS mut     | ATP5MC3 | Validated         |
| CS      | Citrate syn | HGNC:242 | Required    | shRNA scr    | Human     | NRAS mut     | CS      | +: Ferr Validated |
| EMC2    | ER membr    | HGNC:289 | Required    | shRNA scr    | Human     | NRAS mut     | EMC2    | +: F Validated    |
| ACSF2   | Acyl-CoA    | HGNC:261 | Required    | shRNA scr    | Human     | NRAS mut     | ACSF2   | +: Validated      |
| NOX1    | Nicotinam   | HGNC:788 | Suppress    | Inhibition   | Human     | KRAS mut     | NOX1    | +: I Deduced      |
| CYBB    | Cytochro    | HGNC:257 | Suppress    | Inhibition   | Human     | KRAS mut     | CYBB    | +: F Deduced      |
| NOX3    | Nicotinam   | HGNC:789 | Suppress    | Inhibition   | Human     | KRAS mut     | NOX3    | +: I Deduced      |
| NOX4    | Nicotinam   | HGNC:789 | Suppress    | Inhibition   | Human     | KRAS mut     | NOX4    | +: I Deduced      |
| NOX5    | Nicotinam   | HGNC:148 | Suppress    | Inhibition   | Human     | KRAS mut     | NOX5    | +: I Deduced      |
| DUOX1   | Dual oxid   | HGNC:306 | Suppress    | Inhibition   | Human     | KRAS mut     | DUOX1   | +: Deduced        |
| DUOX2   | Dual oxid   | HGNC:132 | Suppress    | Inhibition   | Human     | KRAS mut     | DUOX2   | +: Deduced        |
| G6PD    | Glucose-6   | HGNC:405 | Required    | shRNA sil    | Human     | KRAS mut     | G6PD    | +: F Validated    |
| PGD     | Phosphog    | HGNC:889 | Required    | shRNA sil    | Human     | KRAS mut     | PGD     | +: F Validated    |
| VDAC2   | Voltage-d   | HGNC:126 | Required    | shRNA sil    | Human     | KRAS mut     | VDAC2   | +: Validated      |
| PIK3CA  | Phosphati   | HGNC:897 | Inhibitor   | bCell surviv | Mice      | HT22 cells   | PIK3CA  | -: Validated      |
| FLT3    | Fms relate  | HGNC:376 | Inhibitor   | bCell surviv | Mice      | HT22 cells   | FLT3    | +: Li Validated   |
| SCP2    | Sterol carr | HGNC:106 | SCP-2 inh   | Cell viabili | Mice      | PZL cells    | SCP2    | +: F Validated    |
| TP53    | Tumor prc   | HGNC:119 | Inhibits cy | Cell death   | Human, m  | H1299, U2    | TP53    | -: SI Validated   |
| ACSL4   | Acyl-CoA    | HGNC:357 | Deletion o  | Retroviral-  | Human     | Chronic m    | ACSL4   | +: Predicted      |
| LPCAT3  | Lysophos    | HGNC:302 | Deletion o  | Retroviral-  | Human     | Chronic m    | LPCAT3  | +: Predicted      |
| NRAS    | NRAS prot   | HGNC:798 | NRAS12V     | Cell viabili | Human     | RMS13 cel    | NRAS    | +: F Deduced      |
| KRAS    | KRAS prot   | HGNC:64C | KRAS12V     | Cell viabili | Human     | RMS13 cel    | KRAS    | +: F Deduced      |
| HRAS    | HRas prot   | HGNC:517 | HRAS12V     | Cell viabili | Human     | RMS13 cel    | HRAS    | +: F Deduced      |
| TF      | Transferrir | HGNC:117 | Essential f | Killing acti | Mice      | Mouse em     | TF      | +: Ferr Validated |
| TFRC    | Transferrir | HGNC:117 | RNAi of tr  | RNAi         | Mice      | Mouse em     | TFRC    | +: F Validated    |
| TFR2    | Transferrir | HGNC:117 | RNAi of tr  | RNAi         | Mice      | Mouse em     | TFR2    | +: F Validated    |
| SLC38A1 | Solute car  | HGNC:134 | RNAi knoc   | RNAi knoc    | Mice      | Mouse em     | SLC38A1 | : Validated       |
| SLC1A5  | Solute car  | HGNC:109 | Pharmacol   | RNAi knoc    | Mice      | Mouse em     | SLC1A5  | +: Validated      |
| GLS2    | Glutamina   | HGNC:295 | Both inhib  | shRNA, w     | Mice      | Mouse em     | GLS2    | +: G Validated    |
| GOT1    | Glutamic-   | HGNC:443 | RNAi red    | ushRNA, q    | Mice      | Mouse em     | GOT1    | +: : Validated    |
| CARS1   | Cysteinyl-  | HGNC:149 | Required    | fsiRNA scr   | Human, ra | HT-1080 f    | CARS1   | -: Validated      |
| TP53    | Tumor prc   | HGNC:119 | Wild type   | Cell death   | Human     | H1299 cell   | TP53    | -: SI Validated   |
| ALOX5   | Arachidon   | HGNC:435 | The 5-Lip   | Cell Viabili | Mice      | HT22 mou     | ALOX5   | +: Validated      |
| KEAP1   | Kelch like  | HGNC:231 | Knockdown   | Western b    | Human, m  | HepG2, H     | KEAP1   | -: I Validated    |
| HMOX1   | Heme oxy    | HGNC:501 | Zinc proto  | Cell viabili | Human, m  | HT-1080 f    | HMOX1   | +: Validated      |
| TP53    | Tumor prc   | HGNC:119 | p53^3KR/    | Western b    | Mice      | p53^3KR/     | TP53    | -: SI Validated   |
| TP53    | Tumor prc   | HGNC:119 | Incubation  | Cell viabili | Human, m  | Mouse em     | TP53    | -: SI Validated   |
| GLS2    | Glutamina   | HGNC:295 | Upregulat   | Cell viabili | Mice      | Mouse em     | GLS2    | +: F Validated    |
| ATG5    | Autophag    | HGNC:589 | Knockout    | shRNA        | Human, m  | Mouse em     | ATG5    | +: F Validated    |

|         |                   |          |                        |              |          |                |         |              |
|---------|-------------------|----------|------------------------|--------------|----------|----------------|---------|--------------|
| ATG7    | Autophagy         | HGNC:169 | Knockout /shRNA        | Human, m     | Mouse em | ATG7           | +: F    | Validated    |
| NCOA4   | Nuclear re        | HGNC:767 | Inhibition /shRNA, ge  | Human        |          | PANC1 or NCOA4 | :-      | Validated    |
| TF      | Transferrin       | HGNC:117 | Involved in            | Western b    | Human    | MDA MB 4       | TF      | +: Lipic     |
| ALOX5   | Arachidon         | HGNC:435 | Silencing /qPCR        | Human        |          | G-401 cell     | ALOX5   | +: Validated |
| ALOX12  | Arachidon         | HGNC:429 | Silencing /qPCR        | Human        |          | G-401 cell     | ALOX12  | +: Validated |
| ALOX12B | Arachidon         | HGNC:433 | Silencing /qPCR        | Human        |          | G-401 cell     | ALOX12B | Validated    |
| ALOX15  | Arachidon         | HGNC:433 | Silencing /qPCR        | Human        |          | G-401 cell     | ALOX15  | +: Validated |
| ALOX15B | Arachidon         | HGNC:434 | Silencing /qPCR, siRN  | Human        |          | G-401, BJ      | ALOX15B | Validated    |
| ALOXE3  | Arachidon         | HGNC:137 | Silencing /qPCR, siRN  | Human        |          | G-401, BJ      | ALOXE3  | +: Validated |
| PHKG2   | Phosphory         | HGNC:893 | U-2-OS c/shRNA su      | Human        |          | U-2-OS, P      | PHKG2   | +: Validated |
| TFRC    | Transferrin       | HGNC:117 | The gene /RNAi scre    | Mice         |          | Mouse em       | TFRC    | +: L         |
| ACO1    | Aconitase         | HGNC:117 | The gene /RNAi scre    | Mice         |          | Mouse em       | ACO1    | +: L         |
| IREB2   | iron respo        | HGNC:611 | The gene /RNAi scre    | Mice         |          | Mouse em       | IREB2   | +: L         |
| SLC38A1 | Solute car        | HGNC:134 | The gene /RNAi scre    | Mice         |          | Mouse em       | SLC38A1 | : Screened   |
| GLS2    | Glutamina         | HGNC:295 | The gene /RNAi scre    | Mice         |          | Mouse em       | GLS2    | +: L         |
| G6PDX   | _NA_ _NA_         |          | The gene /RNAi scre    | Mice         |          | Mouse em       | G6PDX   | +: Screened  |
| ULK1    | Unc-51 lik        | HGNC:125 | Potential /RNAi scre   | Mice         |          | Mouse em       | ULK1    | +: L         |
| ATG3    | Autophagy         | HGNC:209 | Potential /RNAi scre   | Mice         |          | Mouse em       | ATG3    | +: L         |
| ATG4D   | Autophagy         | HGNC:207 | Potential /RNAi scre   | Mice         |          | Mouse em       | ATG4D   | +: Screened  |
| ATG5    | Autophagy         | HGNC:589 | Potential /RNAi scre   | Mice         |          | Mouse em       | ATG5    | +: L         |
| BECN1   | Beclin 1          | HGNC:103 | Potential /RNAi scre   | Mice         |          | Mouse em       | BECN1   | +: Screened  |
| MAP1LC3 | Microtubu         | HGNC:683 | Potential /RNAi scre   | Mice         |          | Mouse em       | MAP1LC3 | : Screened   |
| GABARAP | GABA type         | HGNC:132 | Potential /RNAi scre   | Mice         |          | Mouse em       | GABARAP | Screened     |
| GABARAP | GABA type         | HGNC:406 | Potential /RNAi scre   | Mice         |          | Mouse em       | GABARAP | Screened     |
| ATG16L1 | Autophagy         | HGNC:214 | Potential /RNAi scre   | Mice         |          | Mouse em       | ATG16L1 | : Screened   |
| WIPI1   | WD repea          | HGNC:254 | Potential /RNAi scre   | Mice         |          | Mouse em       | WIPI1   | +: L         |
| WIPI2   | WD repea          | HGNC:322 | Potential /RNAi scre   | Mice         |          | Mouse em       | WIPI2   | +: L         |
| SNX4    | Sorting ne        | HGNC:111 | Potential /RNAi scre   | Mice         |          | Mouse em       | SNX4    | +: L         |
| ATG13   | Autophagy         | HGNC:293 | Knockout /Gene knoc    | Mice         |          | Mouse em       | ATG13   | +: Validated |
| ULK2    | Unc-51 lik        | HGNC:134 | Knockout /Gene knoc    | Mice         |          | Mouse em       | ULK2    | +: L         |
| NCOA4   | Nuclear re        | HGNC:767 | Eliminator             | RNAi knoc    | Human, m | Mouse em       | NCOA4   | +: Validated |
| ACSL4   | Acyl-CoA          | HGNC:357 | Knockdown              | shRNA, ge    | Human    | LNCaP (hu      | ACSL4   | +: Validated |
| TP53    | Tumor prc         | HGNC:119 | p53 acetyl             | Mass spec    | Human, m | H1299 cell     | TP53    | :-: S        |
| SAT1    | Spermidin         | HGNC:105 | p53-mediated           | qRT-PCR,     | Human, m | H1299, U2      | SAT1    | +: A         |
| ALOX15  | Arachidon         | HGNC:433 | SAT1- anc              | Cell death   | Human    | H1299, U2      | ALOX15  | +: Validated |
| ACSL4   | Acyl-CoA          | HGNC:357 | Inhibition /Cell death | Mice         |          | Mouse em       | ACSL4   | +: Validated |
| LPCAT3  | Lysophos          | HGNC:302 | Knockdown              | shRNA        | Mice     | Mouse lun      | LPCAT3  | +: Validated |
| ALOX15  | Arachidon         | HGNC:433 | Lipoxstati             | Identificati | Mice     | Kidney of      | ALOX15  | +: Validated |
| ACSL4   | Acyl-CoA          | HGNC:357 | An essenti             | Cell viabili | Human, m | Mouse em       | ACSL4   | +: Validated |
| KEAP1   | Kelch like        | HGNC:231 | Keap 1 sile            | Cell viabili | Mice     | Head and       | KEAP1   | :-: I        |
| EGFR    | Epidermal         | HGNC:323 | Cell death             | Fluorescer   | Human    | Human m:       | EGFR    | +: N         |
| NOX4    | NADPH o           | HGNC:789 | Inhibition /Fluorescer | Human        |          | Human m:       | NOX4    | +: I         |
| MAPK3   | Mitogen- $\alpha$ | HGNC:687 | Inhibiting             | Immunobl     | Human    | Human m:       | MAPK    | :-: C        |

|           |                                                                               |          |                   |                      |           |                                      |
|-----------|-------------------------------------------------------------------------------|----------|-------------------|----------------------|-----------|--------------------------------------|
| MAPK1     | Mitogen-activated protein kinase 1                                            | HGNC:687 | Inhibiting        | Immunoblot           | Human     | Human m:MAPK :-: (Validated          |
| BID       | BH3 interacting domain containing 1                                           | HGNC:105 | BID deletion      | Cell viability       | Mice      | HT-22 cell BID :+: FerValidated      |
| ACSL4     | Acyl-CoA oxidase 4                                                            | HGNC:357 | Knockout          | CRISPR/Cas9          | Human, m  | NIH3T3, HACSL4 :+: Validated         |
| ZEB1      | Zinc finger E-box binding domain containing 1                                 | HGNC:116 | Knockout          | sgRNA, cell          | Human     | KP4 pancreas ZEB1 :+: LiValidated    |
| KEAP1     | Kelch like ECH-associated protein 1                                           | HGNC:231 | Keap1 inhibition  | Cell viability       | Human, ra | F98, U87 cell KEAP1 :+: Validated    |
| DPP4      | Dipeptidyl aminopeptidase 4                                                   | HGNC:30  | Required for      | Cell death           | Human, m  | TP53-/- HDPP4 :+: LValidated         |
| ALOX15    | Arachidonate 15-lipoxygenase                                                  | HGNC:433 | Suppresses        | siRNA, transfection  | Human     | HT1080, P ALOX15 :+Validated         |
| ALOX12    | Arachidonate 12-lipoxygenase                                                  | HGNC:429 | 12-LOX inhibition | siRNA, transfection  | Human     | HT1080, P ALOX12 :+Validated         |
| CDKN2A    | Cyclin dependent kinase 2A                                                    | HGNC:178 | Combination       | RNAi, immunoblot     | Human, m  | H1299, Sa CDKN2A : Validated         |
| PEBP1     | Phosphatidylethanolamine binding protein 1                                    | HGNC:863 | Elevated levels   | Western blot         | Human, m  | HK2, HAEC (PEBP1/15 Validated        |
| SOCS1     | Suppressor of cytokine signaling 1                                            | HGNC:193 | Expression        | Cell death           | Human     | U2OS or HSOCS1 :+: Validated         |
| CDO1      | Cysteine dioxygenase 1                                                        | HGNC:179 | CDO1 suppression  | siRNA, Western blot  | Human     | Gastric cancer CDO1 :-: (Validated   |
| MYB       | MYB proto-oncogene                                                            | HGNC:754 | Erastin-induced   | Western blot         | Human     | Gastric cancer MYB :+: CValidated    |
| HMOX1     | Heme oxygenase 1                                                              | HGNC:501 | Inhibiting        | Cell viability       | Human     | MDA-MB-HMOX1 :+Validated             |
| MAPK8     | Mitogen-activated protein kinase 8                                            | HGNC:688 | JNK1/2 inhibition | MitoSOX, rat         | Rat       | PC12 cells MAPK8 :+ Validated        |
| MAPK9     | Mitogen-activated protein kinase 9                                            | HGNC:688 | JNK1/2 inhibition | MitoSOX, rat         | Rat       | PC12 cells MAPK9 :+ Validated        |
| MAPK1     | Mitogen-activated protein kinase 1                                            | HGNC:687 | ERK1/2 inhibition | MitoSOX, rat         | Rat       | PC12 cells MAPK1 :+ Validated        |
| MAPK3     | Mitogen-activated protein kinase 3                                            | HGNC:687 | ERK1/2 inhibition | MitoSOX, rat         | Rat       | PC12 cells MAPK3 :+ Validated        |
| SLC1A5    | Solute carrier family 1 member 5                                              | HGNC:109 | Overexpression    | Cell viability       | Human     | Melanoma SLC1A5 :+ Validated         |
| CHAC1     | Chaperone associated C-terminal glutathione S-transferase domain containing 1 | HGNC:286 | CHAC1 deletion    | Western blot         | Human     | MDA-MB-CHAC1 :-: Validated           |
| MAPK14    | Mitogen-activated protein kinase 14                                           | HGNC:687 | Ferroptosis       | Cell viability       | Mice      | TM4 Sertoli MAPK14 :- Validated      |
| LINC00472 | Long intergenic non-coding RNA LINC00472                                      | HGNC:213 | Increases         | Bisulfite sequencing | Human     | Lung cancer LINC00472 Validated      |
| NOX4      | NADPH oxidase 4                                                               | HGNC:789 | Activated         | Western blot         | Human, ra | Rat C6, hu NOX4 :+: IValidated       |
| GOT1      | Glutamic-oxaloacetic transaminase 1                                           | HGNC:443 | Overexpression    | Immunoblot           | Human     | A375 and GOT1 :+: εValidated         |
| BECN1     | Beclin 1                                                                      | HGNC:103 | Knockdown         | shRNA, Western blot  | Human, m  | HCT116, CBECN1 :-: Validated         |
| PRKAA2    | Protein kinase R, catalytic subunit 2                                         | HGNC:937 | Inhibition        | siRNA, Western blot  | Human     | HCT116 and PRKAA2 :+Validated        |
| PRKAA1    | Protein kinase R, catalytic subunit 1                                         | HGNC:937 | Inhibition        | siRNA, Western blot  | Human     | HCT116 and PRKAA1 :+Validated        |
| ELAVL1    | ELAV like 1                                                                   | HGNC:331 | ELAVL1 silencing  | Immunohistochemistry | Human, m  | Human liver ELAVL1 :+ Validated      |
| BAP1      | BRCA1 associated protein 1                                                    | HGNC:95  | Suppresses        | Flow cytometry       | Human     | HEK-293T BAP1 :-: SValidated         |
| TP53      | Tumor protein p53                                                             | HGNC:119 | Facilitates       | Western blot         | Rat       | Hepatic stellate TP53 :+: FValidated |
| ABCC1     | ATP binding cassette subfamily C member 1                                     | HGNC:51  | Accelerates       | Western blot         | Human     | HAP1, H12 ABCC1 :-: Validated        |
| ACSL4     | Acyl-CoA oxidase 4                                                            | HGNC:357 | Inhibition        | siRNA, Western blot  | Human, m  | Male C57EACSL4 :+: Validated         |
| MIR6852   | microRNA-6852                                                                 | HGNC:499 | Promotes          | qRT-PCR, luciferase  | Human     | A549 and MIR6852 : Validated         |
| ACVR1B    | Activin A receptor type 1B                                                    | HGNC:172 | Inhibition        | Western blot         | Human     | HK-2 cells ACVR1B :-Validated        |
| TGFBR1    | Transforming growth factor beta receptor 1                                    | HGNC:117 | Inhibition        | Western blot         | Human     | HK-2 cells TGFBR1 :- Validated       |
| BAP1      | BRCA1 associated protein 1                                                    | HGNC:95  | Promotes          | Immunoprecipitation  | Human     | HEK293T cell BAP1 :-: SValidated     |
| EPAS1     | Endothelial nitric oxide synthase 1                                           | HGNC:337 | A driver of       | CRISPR, cell         | Mice      | 786-O cell EPAS1 :+: Validated       |
| HILPDA    | Hypoxia-inducible long intergenic non-coding RNA HILPDA                       | HGNC:288 | Promotes          | RNA-Seq, luciferase  | Mice      | 786-O cell HILPDA :+ Validated       |
| HIF1A     | Hypoxia-inducible factor 1 alpha                                              | HGNC:491 | Re-sensitizes     | cDNA screening       | Mice      | 786-O cell HIF1A :+: IValidated      |
| ALOX12    | Arachidonate 12-lipoxygenase                                                  | HGNC:429 | An essential      | RNAi, qRT-PCR        | Human, m  | H1299 cell ALOX12 :+Validated        |
| ACSL4     | Acyl-CoA oxidase 4                                                            | HGNC:357 | Required for      | Western blot         | Human     | U2OS ACSL4 :+: Validated             |
| HMOX1     | Heme oxygenase 1                                                              | HGNC:501 | Enhances          | Gene transcription   | Human     | H1299 cell HMOX1 :+Validated         |
| IFNG      | Interferon gamma                                                              | HGNC:543 | Interferon        | BODIPY-CH2           | Human, m  | HT-1080, IFNG :-: SValidated         |

|                |              |           |               |             |          |             |             |             |
|----------------|--------------|-----------|---------------|-------------|----------|-------------|-------------|-------------|
| ANO6           | Anoctamir    | HGNC:252  | Essential for | Immunocy    | Human, m | A549, Cal2  | ANO6 :+:    | Validated   |
| LPIN1          | Lipin 1      | HGNC:133  | Overexpre     | Enzyme-li   | Mice     | C57BL/6 n   | LPIN1 :+:   | Validated   |
| HMGB1          | High mobi    | HGNC:498  | Required for  | Gene trans  | Human, m | HL-60 cell  | HMGB1 :+:   | Validated   |
| TNFAIP3        | TNF alpha    | HGNC:118  | Overexpre     | Lentivirus  | Human    | HUVEC ce    | TNFAIP3 :-: | Validated   |
| TLR4           | Toll like re | HGNC:118  | Knockdown     | Immunohi    | Rat      | Sprague D   | TLR4 :+:    | Validated   |
| NOX4           | NADPH o      | HGNC:789  | Knockdown     | Immunohi    | Rat      | Sprague D   | NOX4 :+:    | Validated   |
| ATF3           | Activating   | HGNC:785  | Promotes      | Cell viabil | Human    | HT1080 ce   | ATF3 :-:    | Validated   |
| ATM            | ATM serin    | HGNC:795  | Essential for | siRNA, we   | Human    | MDA-MB-ATM  | :-:         | Validated   |
| YY1AP1         | YY1 associ   | HGNC:309  | Makes cell    | Cell death  | Human, m | Mouse em    | YAP :+:     | Validated   |
| EGLN2          | Egl-9 fami   | HGNC:146  | Inhibiting    | Cytotoxicit | Human, m | Calu-1, T   | EGLN2 :-:   | Validated   |
| MIOX           | Myo-inosi    | HGNC:145  | Overexpre     | MTT assay   | Human, m | HK-2 cells  | MIOX :-:    | Validated   |
| TAZ            | Tafazzin     | HGNC:115  | TAZ remo      | Cell viabil | Human, m | RCC4, 78    | TAZ :+:     | Validated   |
| MTDH           | Metadheri    | HGNC:296  | Can enhar     | Cell viabil | Human, m | Cell lines  | MTDH :-:    | Validated   |
| IDH1           | Isocitrate c | HGNC:538  | Deletion o    | Cell transf | Human    | HEK293T,    | IDH1 :-:    | Validated   |
| SIRT1          | Sirtuin 1    | HGNC:149  | Knockout      | Lipid pero  | Mice     | Mice in C5  | SIRT1 :+:   | Predicted   |
| TAZ            | Tafazzin     | HGNC:115  | TAZ remo      | siRNA, qR   | Human    | TOV-21G,    | TAZ :+:     | Validated   |
| BECN1          | Beclin 1     | HGNC:103  | Overexpre     | Cell viabil | Human    | SH-SY5Y c   | (Beclin1/SI | Validated   |
| FBXW7          | F-box and    | HGNC:167  | FBXW7 pl      | Cell viabil | Human, m | Hepatic st  | FBXW7 :+:   | Deduced     |
| PANX1          | Pannexin 1   | HGNC:859  | Deletion p    | Cell viabil | Human, m | HK-2 cells  | PANX1 :-:   | Validated   |
| DNAJB6         | DnaJ heat    | HGNC:148  | Promotes      | Western b   | Human, m | Cell lines  | DNAJB6 :-:  | Predicted   |
| BACH1          | BTB doma     | HGNC:935  | Promotes      | Western b   | Mice     | C57BL/6J    | BACH1 :+:   | Validated   |
| ACSL4          | Acyl-CoA     | HGNC:357  | Overexpre     | Western b   | Human    | HEB, T98    | GACSL4 :-:  | Validated   |
| LONP1          | Lon peptic   | HGNC:947  | Inhibition    | Cell viabil | Human    | PANC1, B    | LONP1 :-:   | Validated   |
| PTGS2          | Prostaglan   | HGNC:96C  | Simply a      | dRT-qPCR,   | Human    | BJeLR cells | Validated   | _NA_        |
| DUSP1          | Dual speci   | HGNC:306  | Expression    | RT-qPCR,    | Human    | BJeLR cells | Deduced     | Inferred as |
| NOS2           | Nitric oxid  | HGNC:787  | Expression    | RT-qPCR,    | Human    | BJeLR cells | Deduced     | Inferred as |
| NCF2           | Neutrophi    | HGNC:766  | Expression    | RT-qPCR,    | Human    | BJeLR cells | Deduced     | Inferred as |
| MT3            | Metallothi   | HGNC:74C  | Expression    | RT-qPCR,    | Human    | BJeLR cells | Deduced     | Inferred as |
| UBC            | Ubiquitin    | (HGNC:124 | Expression    | RT-qPCR,    | Human    | BJeLR cells | Deduced     | Inferred as |
| ALB            | Albumin      | HGNC:399  | Expression    | RT-qPCR,    | Human    | BJeLR cells | Deduced     | Inferred as |
| TXNRD1         | Thioredoxi   | HGNC:124  | Expression    | RT-qPCR,    | Human    | BJeLR cells | Deduced     | Inferred as |
| SRXN1          | Sulfiredoxi  | HGNC:161  | Expression    | RT-qPCR,    | Human    | BJeLR cells | Deduced     | Inferred as |
| GPX2           | Glutathion   | HGNC:455  | Expression    | RT-qPCR,    | Human    | BJeLR cells | Deduced     | Inferred as |
| BNIP3          | BCL2 inter   | HGNC:108  | Expression    | RT-qPCR,    | Human    | BJeLR cells | Deduced     | Inferred as |
| OXSRL1         | Oxidative    | :HGNC:85C | Expression    | RT-qPCR,    | Human    | BJeLR cells | Deduced     | Inferred as |
| SELENOS        | Selenopro    | HGNC:303  | Expression    | RT-qPCR,    | Human    | BJeLR cells | Deduced     | Inferred as |
| ANGPTL7        | Angiopoie    | HGNC:24C  | Expression    | RT-qPCR,    | Human    | BJeLR cells | Deduced     | Inferred as |
| CHAC1          | ChaC glut    | :HGNC:286 | Up-regula     | RNA-seq,    | Human    | HT-1080     | ε           | Validated   |
| SLC7A11        | Solute cari  | HGNC:11C  | Similar to    | RNA silenc  | Human    | HT-1080 c   | Deduced     | Further stu |
| DDIT4          | DNA dam      | :HGNC:249 | Up-regula     | RNA-seq     | Human    | HT-1080 c   | Screened    | Further stu |
| LOC28456_NA_NA | Up-regula    | RNA-seq   | Human         | HT-1080 c   | Screened | Further stu |             |             |
| ASNS           | Asparagin    | :HGNC:753 | Up-regula     | RNA-seq     | Human    | HT-1080 c   | Screened    | Further stu |
| TSC22D3        | TSC22 dor    | HGNC:305  | Up-regula     | RNA-seq     | Human    | HT-1080 c   | Screened    | Further stu |

|              |              |          |             |             |       |            |           |             |
|--------------|--------------|----------|-------------|-------------|-------|------------|-----------|-------------|
| DDIT3        | DNA dam      | HGNC:272 | Up-regula   | RNA-seq     | Human | HT-1080    | cScreened | Further stu |
| JDP2         | Jun dimeri   | HGNC:175 | Up-regula   | RNA-seq     | Human | HT-1080    | cScreened | Further stu |
| SESN2        | Sestrin 2    | HGNC:207 | Up-regula   | RNA-seq     | Human | HT-1080    | cScreened | Further stu |
| SLC1A4       | Solute cari  | HGNC:109 | Up-regula   | RNA-seq     | Human | HT-1080    | cScreened | Further stu |
| PCK2         | Phosphoei    | HGNC:872 | Up-regula   | RNA-seq     | Human | HT-1080    | cScreened | Further stu |
| TXNIP        | Thioredoxi   | HGNC:169 | Up-regula   | RNA-seq     | Human | HT-1080    | cScreened | Further stu |
| VLDLR        | Very low c   | HGNC:126 | Up-regula   | RNA-seq     | Human | HT-1080    | cScreened | Further stu |
| GPT2         | Glutamic-    | HGNC:18C | Up-regula   | RNA-seq     | Human | HT-1080    | cScreened | Further stu |
| PSAT1        | Phosphos     | HGNC:191 | Up-regula   | RNA-seq     | Human | HT-1080    | cScreened | Further stu |
| LURAP1L      | Leucine ric  | HGNC:314 | Up-regula   | RNA-seq     | Human | HT-1080    | cScreened | Further stu |
| SLC7A5       | Solute cari  | HGNC:11C | Up-regula   | RNA-seq     | Human | HT-1080    | cScreened | Further stu |
| HERPUD1      | Homocyst     | HGNC:137 | Up-regula   | RNA-seq     | Human | HT-1080    | cScreened | Further stu |
| XBP1         | X-box bin    | HGNC:128 | Up-regula   | RNA-seq     | Human | HT-1080    | cScreened | Further stu |
| ATF3         | Activating   | HGNC:785 | Up-regula   | RNA-seq     | Human | HT-1080    | cScreened | Further stu |
| SLC3A2       | Solute cari  | HGNC:11C | Up-regula   | RNA-seq     | Human | HT-1080    | cScreened | Further stu |
| CBS          | Cystathior   | HGNC:155 | Up-regula   | RNA-seq     | Human | HT-1080    | cScreened | Further stu |
| ATF4         | Activating   | HGNC:786 | Up-regula   | RNA-seq     | Human | HT-1080    | cScreened | Further stu |
| ZNF419       | Zinc finger  | HGNC:206 | Up-regula   | RNA-seq     | Human | HT-1080    | cScreened | Further stu |
| KLHL24       | Kelch like   | HGNC:259 | Up-regula   | RNA-seq     | Human | HT-1080    | cScreened | Further stu |
| TRIB3        | Tribbles p   | HGNC:162 | Up-regula   | RNA-seq     | Human | HT-1080    | cScreened | Further stu |
| ZFP69B       | ZFP69 zinc   | HGNC:28C | Up-regula   | RNA-seq     | Human | HT-1080    | cScreened | Further stu |
| ATP6V1G2     | ATPase H+    | HGNC:862 | Up-regula   | RNA-seq     | Human | HT-1080    | cScreened | Further stu |
| VEGFA        | Vascular e   | HGNC:126 | Up-regula   | RNA-seq     | Human | HT-1080    | cScreened | Further stu |
| GDF15        | Growth di    | HGNC:301 | Up-regula   | RNA-seq     | Human | HT-1080    | cScreened | Further stu |
| TUBE1        | Tubulin e    | HGNC:207 | Up-regula   | RNA-seq     | Human | HT-1080    | cScreened | Further stu |
| ARRDC3       | Arrestin d   | HGNC:292 | Up-regula   | RNA-seq     | Human | HT-1080    | cScreened | Further stu |
| CEBPG        | CCAAT en     | HGNC:183 | Up-regula   | RNA-seq     | Human | HT-1080    | cScreened | Further stu |
| SNORA16      | Small nucl   | HGNC:326 | Down-reg    | RNA-seq     | Human | HT-1080    | cScreened | Further stu |
| RGS4         | Regulator    | HGNC:10C | Down-reg    | RNA-seq     | Human | HT-1080    | cScreened | Further stu |
| BLOC1S5      | BLOC1S5-     | HGNC:42C | Down-reg    | RNA-seq     | Human | HT-1080    | cScreened | Further stu |
| LOC39070_NA_ | _NA_         |          | Down-reg    | RNA-seq     | Human | HT-1080    | cScreened | Further stu |
| EIF2S1       | Eukaryotic   | HGNC:326 | Phosphory   | Western b   | Human | HT-1080    | cDeduced  | _NA_        |
| KIM-1        | Kidney inj   | _NA_     | Down-reg    | Real-time   | Mice  | Fer-1-tre  | cDeduced  | _NA_        |
| IL6          | Interleukin  | HGNC:601 | Down-reg    | Real-time   | Mice  | Fer-1-tre  | cDeduced  | _NA_        |
| CXCL2        | C-X-C mc     | HGNC:46C | Down-reg    | Real-time   | Mice  | Fer-1-tre  | cDeduced  | _NA_        |
| RELA         | RELA prot    | HGNC:995 | Down-reg    | Real-time   | Mice  | Fer-1-tre  | cDeduced  | _NA_        |
| HSD17B11     | Hydroxyst    | HGNC:229 | Enriched    | irGene trap | Human | Chronic m  | Screened  | _NA_        |
| AGPAT3       | 1-acylglyc   | HGNC:326 | Enriched    | irGene trap | Human | Chronic m  | Screened  | _NA_        |
| SETD1B       | SET domai    | HGNC:291 | Enriched    | irGene trap | Human | Chronic m  | Screened  | _NA_        |
| HMOX1        | Heme oxy     | HGNC:501 | Its express | Western b   | Human | Pancreatic | Deduced   | _NA_        |
| TF           | Transferrir  | HGNC:117 | Its express | Gene expr   | Human | Patient PD | Deduced   | _NA_        |
| FTL          | Ferritin lig | HGNC:399 | Its express | Gene expr   | Human | Patient PD | Deduced   | _NA_        |
| RPL8         | Ribosomal    | HGNC:103 | Significant | Gene expr   | Human | Patient PD | Deduced   | _NA_        |

|         |             |          |                       |          |             |           |              |
|---------|-------------|----------|-----------------------|----------|-------------|-----------|--------------|
| ATP5MC3 | ATP synth   | HGNC:843 | Significant Gene expr | Human    | Patient PD  | Deduced   | _NA_         |
| TFRC    | Transferrin | HGNC:117 | Expression Gene expr  | Human    | Patient PD  | Deduced   | _NA_         |
| MAFG    | MAF bZIP    | HGNC:678 | The intera            | Human, m | HepG2, Hc   | Deduced   | _NA_         |
| IL33    | Interleukin | HGNC:160 | IL-33 upre            | Mice     | C57BL/6 n   | Deduced   | _NA_         |
| FTH1    | Ferritin he | HGNC:397 | An increas            | Human    | HT1080 ce   | Validated | An error r   |
| SLC40A1 | Solute car  | HGNC:109 | Erastin-inc           | Mice     | Bone marr   | Validated | Used as a    |
| TF      | Transferrin | HGNC:117 | Erastin-inc           | Mice     | Bone marr   | Validated | Used as a    |
| TFRC    | Transferrin | HGNC:117 | Erastin-inc           | Mice     | Bone marr   | Validated | Used as a    |
| FTH1    | Ferritin he | HGNC:397 | Erastin-inc           | Mice     | Bone marr   | Validated | Used as a    |
| GPX4    | Glutathion  | HGNC:455 | Erastin-inc           | Mice     | Bone marr   | Validated | Used as a    |
| HAMP    | Hepcidin z  | HGNC:155 | Erastin-inc           | Mice     | Bone marr   | Deduced   | _NA_         |
| HSPB1   | Heat shock  | HGNC:524 | Erastin-inc           | Mice     | Bone marr   | Validated | Used as a    |
| NFE2L2  | Nuclear fa  | HGNC:778 | Erastin-inc           | Mice     | Bone marr   | Validated | Used as a    |
| STEAP3  | STEAP3 m    | HGNC:245 | Erastin-inc           | Mice     | Bone marr   | Deduced   | _NA_         |
| DRD5    | Dopamine    | HGNC:302 | Ferroptoti            | Human    | PANC1 ce    | Deduced   | _NA_         |
| GPX4    | Glutathion  | HGNC:455 | Erastin prc           | Human    | PANC1 ce    | Deduced   | Has been     |
| DRD4    | Dopamine    | HGNC:302 | Antiferrop            | Human    | PANC1 ce    | Deduced   | _NA_         |
| MAP3K5  | Mitogen-z   | HGNC:685 | Cold stres            | Human    | A549 cells  | Deduced   | _NA_         |
| MAPK14  | Mitogen-z   | HGNC:687 | Cold stres            | Human    | A549 cells  | Deduced   | _NA_         |
| SLC2A1  | Solute car  | HGNC:110 | Increased             | Human    | H358, A54   | Deduced   | _NA_         |
| SLC2A3  | Solute car  | HGNC:110 | Decreased             | Human    | H358, A54   | Deduced   | _NA_         |
| SLC2A6  | Solute car  | HGNC:110 | Increased             | Human    | H358, A54   | Deduced   | _NA_         |
| SLC2A8  | Solute car  | HGNC:138 | Decreased             | Human    | H358, A54   | Deduced   | _NA_         |
| SLC2A12 | Solute car  | HGNC:180 | Increased             | Human    | H358, A54   | Deduced   | _NA_         |
| GLUT13  | _NA_        | _NA_     | Increased             | Human    | H358, A54   | Deduced   | _NA_         |
| SLC2A14 | Solute car  | HGNC:183 | Decreased             | Human    | H358, A54   | Deduced   | _NA_         |
| EIF2AK4 | Eukaryotic  | HGNC:196 | CHAC1 de              | Human    | MDA-MB-     | Deduced   | _NA_         |
| EIF2S1  | Eukaryotic  | HGNC:326 | CHAC1 de              | Human    | MDA-MB-     | Deduced   | _NA_         |
| ATF4    | Activating  | HGNC:786 | CHAC1 de              | Human    | MDA-MB-     | Deduced   | _NA_         |
| ALOX5   | Arachidon   | HGNC:435 | Overexpre             | Human    | HEK293 ce   | Deduced   | Not essen    |
| ALOX12  | Arachidon   | HGNC:429 | Overexpre             | Human    | HEK293 ce   | Deduced   | Not essen    |
| ALOX15  | Arachidon   | HGNC:433 | Overexpre             | Human    | HEK293 ce   | Deduced   | Not essen    |
| ALOX5   | Arachidon   | HGNC:435 | Necessary             | Mice     | C57BL/6 a   | Deduced   | _NA_         |
| ACSF2   | Acyl-CoA    | HGNC:261 | Increased             | Rat      | Wistar rats | Deduced   | _NA_         |
| IREB2   | Iron respo  | HGNC:611 | Increased             | Rat      | Wistar rats | Deduced   | _NA_         |
| GPX4    | Glutathion  | HGNC:455 | Upregulat             | Rat      | Wistar rats | Validated | Inhibits fer |
| HMGB1   | High mobi   | HGNC:498 | Associatec            | Human, m | HT1080 ar   | Deduced   | _NA_         |
| HMOX1   | Heme oxy    | HGNC:501 | Required              | Mice     | Mice        | Deduced   | _NA_         |
| NFE2L2  | Nuclear fa  | HGNC:778 | DOX treat             | Mice     | Mice        | Deduced   | _NA_         |
| ELAVL1  | ELAV like   | HGNC:331 | Binds to a            | Human    | H358, PC9   | Deduced   | _NA_         |
| SLC3A2  | Solute car  | HGNC:110 | Strongly c            | Human    | HT-1080 c   | Deduced   | _NA_         |
| SLC7A11 | Solute car  | HGNC:110 | Strongly c            | Human    | HT-1080 c   | Deduced   | _NA_         |
| TFAP2C  | Transcripti | HGNC:117 | Activated             | Mice     | C57BL/6 n   | Deduced   | _NA_         |

|         |             |          |            |            |              |            |            |            |                      |
|---------|-------------|----------|------------|------------|--------------|------------|------------|------------|----------------------|
| SP1     | Sp1 transcr | HGNC:112 | Activated  | Behavioral | Mice         | C57BL/6    | n          | Deduced    | _NA_                 |
| HBA1    | Hemoglob    | HGNC:482 | Upregulat  | Tandem     | r            | Human      | HepG2, B   | Deduced    | _NA_                 |
| NNMT    | Nicotinam   | HGNC:78  | Upregulat  | Tandem     | r            | Human      | HepG2, B   | Deduced    | _NA_                 |
| PLIN4   | Perilipin 4 | HGNC:29  | Upregulat  | Tandem     | r            | Human      | HepG2, B   | Deduced    | _NA_                 |
| HIC1    | HIC ZBTB    | HGNC:49  | Essential  | f          | Immunohi     | Human      | HepG2, B   | Deduced    | _NA_                 |
| STMN1   | Stathmin 1  | HGNC:65  | Downregu   | Tandem     | r            | Human      | HepG2, B   | Deduced    | _NA_                 |
| RRM2    | Ribonucle   | HGNC:104 | Downregu   | Tandem     | r            | Human      | HepG2, B   | Deduced    | _NA_                 |
| CAPG    | Capping a   | HGNC:147 | Downregu   | Tandem     | r            | Human      | HepG2, B   | Deduced    | _NA_                 |
| HNF4A   | Hepatocyt   | HGNC:502 | Essential  | f          | Immunohi     | Human      | HepG2, B   | Deduced    | _NA_                 |
| NGB     | Neuroglo    | HGNC:14  | Human      | ne         | Cell death   | Human      | SH-SY5Y    | c          | Deduced              |
| YWHAE   | Tyrosine 3  | HGNC:12  | Required   | k          | Mass spec    | Human      | HEK293T    | c          | Deduced              |
| GABPB1  | GA bindin   | HGNC:407 | Downregu   | RT-qPCR,   | Human        | HepG2, H   | Deduced    | _NA_       |                      |
| AURKA   | Aurora kin  | HGNC:11  | Inhibition | qRT-PCR,   | Human        | OE33, STK  | Predicted  | _NA_       |                      |
| MIR4715 | microRNA    | HGNC:41  | Inhibition | qRT-PCR,   | Human        | OE33, STK  | Predicted  | _NA_       |                      |
| RIPK1   | Receptor i  | HGNC:10  | Reduced    | e          | Cell viabili | Human      | Patient-de | Deduced    |                      |
| PRDX1   | Peroxired   | HGNC:93  | Necessary  | Western    | b            | Human      | Primary    | cc         | Deduced              |
| MIR30B  | microRNA    | HGNC:31  | Upregulati | GSH assay  | Human,       | ra         | Trophobla  | Deduced    |                      |
| SLC7A11 | Solute car  | HGNC:11  | Silencing  | c          | RT-qPCR,     | Human      | HT-1080    | c          | SLC7A11 : Validated  |
| GPX4    | Glutathion  | HGNC:45  | RNAi-mec   | Affinity-b | e            | Human,     | m          | HRAS mut   | GPX4 :-: Li          |
| AKR1C1  | Aldo-keto   | HGNC:384 | Up-regula  | RNA-seq,   | Human        | DU-145     | p          | AKR1C1 :-  | Validated            |
| AKR1C2  | Aldo-keto   | HGNC:38  | Up-regula  | RNA-seq,   | Human        | DU-145     | p          | AKR1C2 :-  | Validated            |
| AKR1C3  | Aldo-keto   | HGNC:38  | Up-regula  | RNA-seq,   | Human        | DU-145     | p          | AKR1C3 :-  | Validated            |
| GPX4    | Glutathion  | HGNC:45  | Knockout   | i          | Cell viabili | Human,     | m          | Mouse em   | GPX4 :-: Li          |
| RB1     | RB transcr  | HGNC:98  | Rb knock-  | RNA interf | Human,       | m          | HCC cell   | li         | RB1 :-: Fer          |
| HSPB1   | Heat shoc   | HGNC:524 | Knockdow   | RNAi,      | RT-(         | Human,     | m          | HeLa and   | HSPB1 :-: Validated  |
| HSF1    | Heat shoc   | HGNC:522 | Knockdow   | RNAi,      | RT-(         | Human,     | m          | HeLa and   | HSF1 :-: Fe          |
| SLC7A11 | Solute car  | HGNC:11  | Overexpre  | Western    | b            | Human,     | m          | H1299 cell | SLC7A11 : Validated  |
| GPX4    | Glutathion  | HGNC:45  | Ex vivo,   | G          | Viability    | a          | Mice       | T cells    | GPX4 :-: F           |
| GCLC    | Glutamate   | HGNC:43  | RNAi knoc  | RNAi,      | qPC          | Mice       | Mouse em   | GCLC :+    | (Validated           |
| SLC7A11 | Solute car  | HGNC:11  | Overexpre  | Cell death | Human        | H1299 cell | SLC7A11    | :          | Validated            |
| NFE2L2  | Nuclear fa  | HGNC:77  | NRF2 play  | Cell       | Viabili      | Human,     | m          | HepG2, H   | e                    |
| SQSTM1  | Sequestos   | HGNC:112 | The intera | Immunopr   | Human,       | m          | HepG2, H   | e          | SQSTM1 :-: Validated |
| NQO1    | NAD(P)H     | HGNC:287 | Knockdow   | qRT-PCR,   | Human,       | m          | HepG2, H   | e          | NQO1 :-: I           |
| HMOX1   | Heme oxy    | HGNC:501 | Knockdow   | qRT-PCR,   | Human,       | m          | HepG2, H   | e          | HMOX1 :-: Validated  |
| FTH1    | Ferritin he | HGNC:397 | Knockdow   | qRT-PCR,   | Human,       | m          | HepG2, H   | e          | FTH1 :-: Fe          |
| MUC1    | Mucin 1, c  | HGNC:75  | MUC1-C     | (shRNA,    | G            | Human      | MDA-MB-    | MUC1 :-:   | Validated            |
| SLC3A2  | Solute car  | HGNC:11  | Required   | f          | Cell surviv  | Mice       | Mouse ES-  | SLC3A2     | :+                   |
| MT1G    | Metallothi  | HGNC:73  | A negative | RNA interf | Human,       | m          | HCC cells  | (          | MT1G :-: F           |
| NFE2L2  | Nuclear fa  | HGNC:77  | Required   | f          | shRNA,       | q          | Human      | Huh7 and   | NFE2L2               |
| SLC40A1 | Solute car  | HGNC:10  | Involved   | ir         | Western      | b          | Human      | MDA MB     | SLC40A1              |
| SLC7A11 | Solute car  | HGNC:11  | Knockdow   | siRNA,     | we           | Human      | MDA MB     | SLC7A11    | :                    |
| GPX4    | Glutathion  | HGNC:45  | Knockdow   | siRNA,     | we           | Human      | MDA MB     | GPX4 :-:   | F                    |
| SLC7A11 | Solute car  | HGNC:11  | Inhibition | i          | Cell viabili | Human,     | m          | AMC-HN     | SLC7A11              |

|         |                                                     |                                |
|---------|-----------------------------------------------------|--------------------------------|
| CISD1   | CDGSH ircHGNC:308Genetic inlCytotoxicitHuman        | HepG2 anCISD1 :-: IValidated   |
| SLC7A11 | Solute cariHGNC:11CElevated leWestern b Human       | H1299 cellSLC7A11 : Validated  |
| FANCD2  | FA compleHGNC:358Inhibits erCell viabilitMice       | Bone marrFANCD2 :-Validated    |
| GPX4    | GlutathionHGNC:455Protects liRT-PCR, wHuman         | Umbilical \GPX4 :-: LValidated |
| NFE2L2  | Nuclear faHGNC:778Nrf2 activzCell viabilitMice      | Head and NFE2L2 :-:Validated   |
| FTMT    | Ferritin miHGNC:173OverexpreCell viabilitMice, fly  | SH-SY5Y cFTMT :-: LValidated   |
| HSPA5   | Heat shocHGNC:523NegativelyCell viabilitHuman, m    | PancreaticHSPA5 :+ : Validated |
| ATF4    | Activating HGNC:786Inhibition cCCK8 cell \Human     | PancreaticATF4 :+ : HValidated |
| SLC7A11 | Solute cariHGNC:11CSc7a11 deCell viabilitMice       | Mice, hepzSLC7A11 : Validated  |
| GPX4    | GlutathionHGNC:455FerroptosiRT-qPCR, Mice           | Forebrain GPX4 :-: FValidated  |
| GPX4    | GlutathionHGNC:455DownregulImmunoblHuman            | Human m:GPX4 :-: LiValidated   |
| HMOX1   | Heme oxyHGNC:501DemonsraRT-PCR, wMice               | Renal proHMOX1 :- Validated    |
| ATF4    | Activating HGNC:786ATF4 exprsiRNA, cellHuman        | U87 and LATF4 :+ : xValidated  |
| NFE2L2  | Nuclear faHGNC:778Nrf2 over Cell growt Human, ra    | F98, U87 cNFE2L2 :+ Validated  |
| TP53    | Tumor prcHGNC:119Inhibits ferRNAi, live-Human, m    | HCT116, aTP53 :+ : NValidated  |
| SLC7A11 | Solute cariHGNC:11CKnockdownshRNA, ce Human         | HCT116 SLC7A11 : Validated     |
| HELLS   | Helicase, lHGNC:486LSH inhibiPlate-colo Human, m    | Lung cancHELLS :+ : Validated  |
| SCD     | Stearoyl-CHGNC:105Depletion shRNA, RTHuman          | A549 cancSCD :-: FeValidated   |
| FADS2   | Fatty acid HGNC:357Depletion shRNA, RTHuman         | A549 cancFADS2 :-: Validated   |
| SRC     | SRC protoHGNC:112Src-STAT3ImmunoblHuman             | MCF-10A SRC :+ : STValidated   |
| STAT3   | Signal trarHGNC:113Src-STAT3ImmunoblHuman           | MCF-10A STAT3 :-: ,Validated   |
| NFE2L2  | Nuclear faHGNC:778ARF-medi Gene transHuman, m       | H1299, SaNFE2L2 :+ Validated   |
| PML     | PromyelocHGNC:911PML expreCell death Human          | IMR90 cellPML :-: FeValidated  |
| MTOR    | MechanistHGNC:394Necessary Cell viabilitMice        | CardiomycMTOR :-: IValidated   |
| NFS1    | NFS1 cystHGNC:159SuppressicRNAi, cell Human         | MDA-MB-NFS1 :-: TValidated     |
| TP63    | Tumor prcHGNC:159Delta Np6 siRNA, cellHuman         | ME-180 cTP63 :-: FeValidated   |
| SLC7A11 | Solute cariHGNC:11COverexperCell viabilitHuman      | MDA-MB-SLC7A11 : Validated     |
| TP53    | Tumor prcHGNC:119p53 stabiliImmunoblHuman           | HT-1080 cTP53 :+ : CValidated  |
| CDKN1A  | Cyclin depHGNC:178Required tCRISPR, shHuman         | HT-1080 cCDKN1A : Validated    |
| MIR137  | microRNAHGNC:315SuppressesImmunoblHuman, m          | MelanomcMIR137 :-: Validated   |
| SLC40A1 | Solute cariHGNC:109OverexpreCell viabilitMice       | TM4 SertoSLC40A1 : Validated   |
| GPX4    | GlutathionHGNC:455Activation Cell viabilitMice      | TM4 SertoGPX4 :-: LiValidated  |
| GPX4    | GlutathionHGNC:455GPX4-ove Immunohi Human           | LCL-K cell GPX4 :-: 8Deduced   |
| ENPP2   | EctonuclecHGNC:335OverexpreCell viabilitRat         | H9c2 cells ENPP2 :-: Validated |
| VDAC2   | Voltage deHGNC:126OverexpreWestern b Human          | HT1080 cVDAC2 :-: Validated    |
| FH      | Fumarate HGNC:37CFH inactivcCRISPR/CcHuman          | UOK262, FFH :+ : GPValidated   |
| CISD2   | CDGSH ircHGNC:242OverexpreCell viabilitHuman        | Head and CISD2 :-: LValidated  |
| SLC40A1 | Solute cariHGNC:109A negativeCell viabilitHuman     | SH-SY5Y cSLC40A1 : Validated   |
| MIR9-1  | microRNAHGNC:316OverexpreImmunoblHuman              | A375 and MIR9 :-: GValidated   |
| MIR9-2  | microRNAHGNC:316OverexpreImmunoblHuman              | A375 and MIR9 :-: GValidated   |
| MIR9-3  | microRNAHGNC:316OverexpreImmunoblHuman              | A375 and MIR9 :-: GValidated   |
| CBS     | CystathionHGNC:155Inhibition cCell viabilitHuman, m | HepG2 celCBS :-: FeValidated   |
| NFE2L2  | Nuclear faHGNC:778AssociatecCell viabilitHuman, m   | HNC cell liNFE2L2 :+ Validated |



|           |                                                        |          |                          |                     |              |                      |        |             |               |
|-----------|--------------------------------------------------------|----------|--------------------------|---------------------|--------------|----------------------|--------|-------------|---------------|
| SQSTM1    | Sequestosin 1                                          | HGNC:112 | Inhibition (siRNA, qPCR) | Human               | HN3 cells    | SQSTM1               | :-     | Validated   |               |
| GPX4      | Glutathione peroxidase 4                               | HGNC:455 | Overexpression           | Cell viability      | Human        | HCT116, LGPX4        | :-     | F Validated |               |
| ISCU      | Iron-sulfur cluster assembly factor                    | HGNC:298 | Overexpression           | Cell viability      | Human        | HL60, KG1            | ISCU   | :+          | G Validated   |
| FTH1      | Ferritin heavy chain 1                                 | HGNC:397 | FTH1 reconstruction      | Cell viability      | Human        | HL60, KG1            | FTH1   | :-          | Li Validated  |
| ACSL3     | Acyl-CoA synthetase long-chain family class 3 member 3 | HGNC:357 | Required for             | Dead cell           | Human        | HEK293, HACSL3       | :-     | I Validated |               |
| OTUB1     | OTU domain containing 1                                | HGNC:233 | Inactivation             | CRISPR/Cas9         | Human, mouse | H1299, SKO           | TUB1   | :+          | Validated     |
| CD44      | CD44 molecule                                          | HGNC:168 | Knockdown                | Western blot        | Human        | H1299 cell           | CD44   | :+          | S Validated   |
| LINC00333 | Long intergenic non-coding RNA LINC00333               | HGNC:338 | Overexpression           | qRT-PCR, Human      | Human        | A549 and (LINC00333) |        |             | Validated     |
| STAT3     | Signal transducer and activator of transcription 3     | HGNC:113 | Upregulation             | Cell viability      | Human        | Osteosarcoma         | STAT3  | :-          | I Validated   |
| BRD4      | Bromodomain containing protein 4                       | HGNC:135 | Inhibition               | Cell proliferation  | Human        | MDA-MB-              | BRD4   | :-          | F Validated   |
| PRDX6     | Peroxiredoxin 6                                        | HGNC:167 | A negative               | Western blot        | Human        | H1299 cell           | PRDX6  | :-          | Validated     |
| MIR17     | microRNA-17                                            | HGNC:315 | Protects against         | Lentivirus          | Human        | HUVEC cell           | MIR17  | :-          | , Validated   |
| SCD       | Stearoyl-CoA desaturase 1                              | HGNC:105 | Inhibition               | Cell viability      | Human, mouse | OVCA4-3, SCD         | :+     | C Validated |               |
| SESN2     | Sestrin 2                                              | HGNC:207 | Has cytoprotective       | MTT assay           | Human, mouse | HepG2 and            | SESN2  | :-          | I Validated   |
| NF2       | Neurofibromin 2                                        | HGNC:777 | Genetic inactivation     | Cell death          | Human, mouse | Mouse embryonic      | NF2    | :-          | Y A Validated |
| ARNTL     | Aryl hydrocarbon receptor nuclear translocator 1       | HGNC:701 | Degradation              | Cytotoxicity        | Human, mouse | Calu-1, T47D         | ARNTL  | :-          | Validated     |
| HIF1A     | Hypoxia-inducible factor 1 alpha                       | HGNC:491 | Destabilization          | Cytotoxicity        | Human, mouse | Calu-1, T47D         | HIF1A  | :-          | Validated     |
| JUN       | Jun proto-oncogene                                     | HGNC:620 | CO-GlcNAc modification   | Immunofluorescence  | Human, mouse | Bel-7402, JUN        | :+     | G S Deduced |               |
| CA9       | Carbonic anhydrase 9                                   | HGNC:138 | Inhibition               | qRT-PCR, Human      | Human        | Mesothelioma         | CA9    | :-          | F Validated   |
| HSPA5     | Heat shock protein 70 kDa class B member 5             | HGNC:523 | Knockdown                | Fluorescence        | Human, mouse | Pancreatic           | GRP78  | :-          | Validated     |
| TMBIM4    | Transmembrane protein 4                                | HGNC:242 | Protects against         | Cell viability      | Human, mouse | Hep G2, HS1R         | :-     | F Validated |               |
| HSPA5     | Heat shock protein 70 kDa class B member 5             | HGNC:523 | Serves as                | Cell viability      | Human, mouse | Glioma cell          | HSPA5  | :+          | Predicted     |
| PLIN2     | Perilipin 2                                            | HGNC:248 | An indispensable         | Cell proliferation  | Human, mouse | SGC7901              | PLIN2  | :-          | F Screened    |
| MIR212    | microRNA-212                                           | HGNC:315 | Overexpression           | Controlled          | Mice         | HT22 and (miR-212)   |        |             | Validated     |
| Fer1HCH   | Ferritin heavy chain 1                                 | HGNC:397 | Reduced                  | RT-qPCR, Drosophila | Fly          | Fer1HCH              |        |             | Predicted     |
| AIFM2     | Apoptosis-inducing factor 2                            | HGNC:214 | A glutathione            | Expression          | Human, mouse | MCF-7, H1hESC        | FPS1   | :+          | C Validated   |
| AIFM2     | Apoptosis-inducing factor 2                            | HGNC:214 | potent                   | Synthetic           | Human, mouse | U-2 OS cell          | FPS1   | :+          | C Validated   |
| LAMP2     | Lysosomal-associated membrane protein 2                | HGNC:650 | Knockdown                | Cell viability      | Human        | ARPE-19, LAMP2       | :+     | Validated   |               |
| ZFP36     | ZFP36 ring finger protein                              | HGNC:128 | ZFP36 plasmid            | Cell viability      | Human, mouse | Hepatic stellate     | ZFP36  | :-          | , Validated   |
| GPX4      | Glutathione peroxidase 4                               | HGNC:455 | Depletion                | Quantitative        | Human, mouse | H9c2 and             | GPX4   | :-          | Li Validated  |
| PROM2     | Prominin 2                                             | HGNC:206 | Induced by               | RNA-seq, Human      | Human        | MCF10A, PROM2        |        |             | Validated     |
| CHMP5     | Charged multivesicular body protein 5                  | HGNC:269 | Ferroptosis              | RNAi, western blot  | Human, mouse | PANC1 and            | CHMP5  | :-          | Validated     |
| CHMP6     | Charged multivesicular body protein 6                  | HGNC:256 | Ferroptosis              | RNAi, western blot  | Human, mouse | PANC1 and            | CHMP6  | :-          | Validated     |
| AKR1C1    | Aldo-keto reductase family 1 class C member 1          | HGNC:384 | Inhibition               | RNAi, cell          | Human        | MeWo, A2             | AKR1C1 | :-          | Validated     |
| AKR1C2    | Aldo-keto reductase family 1 class C member 2          | HGNC:385 | Inhibition               | RNAi, cell          | Human        | MeWo, A2             | AKR1C2 | :-          | Validated     |
| AKR1C3    | Aldo-keto reductase family 1 class C member 3          | HGNC:386 | Inhibition               | RNAi, cell          | Human        | MeWo, A2             | AKR1C3 | :-          | Validated     |
| CBS       | Cystathionine beta-synthase                            | HGNC:155 | Knockdown                | RNAi, cell          | Human        | SKOV3 and            | CBS    | :+          | Cy Validated  |
| NFE2L2    | Nuclear factor erythroid 2-like 2                      | HGNC:778 | Genetically              | RNAi, cell          | Human        | SKOV3 and            | NFE2L2 | +           | Validated     |
| CAV1      | Caveolin 1                                             | HGNC:152 | Cav-1 deficiency         | Immunofluorescence  | Human, mouse | LO2 cells, CAV-1     | :+     | Validated   |               |
| GCH1      | GTP cyclohydrolase 1                                   | HGNC:419 | Gch1 overexpression      | CRISPR activation   | Human        | HT-1080, GCH1        | :+     | I Validated |               |

org/ferrdb/)

| Caution     | Protein en UniProtKB | PMID                 | Remark                 |
|-------------|----------------------|----------------------|------------------------|
| _NA_        | 60S ribosc           | P62917 (R 22632970   | _NA_                   |
| _NA_        | Iron-respc           | P48200 (F22632970    | _NA_                   |
| _NA_        | ATP synth            | P48201 (A 22632970   | ATP5G3 in article      |
| _NA_        | Citrate syn          | O75390 (C22632970    | _NA_                   |
| _NA_        | ER membr             | Q15006 (E22632970    | TTC35 in article       |
| _NA_        | Medium-c             | Q96CM8 (22632970     | _NA_                   |
| The preser  | NADPH o>             | Q9Y5S8 (F22632970    | _NA_                   |
| The preser  | Cytochro             | nP04839 (C 22632970  | NOX2 in article        |
| The preser  | NADPH o>             | Q9HBY0 (I22632970    | _NA_                   |
| The preser  | NADPH o>             | Q9NPH5 (22632970     | _NA_                   |
| The preser  | NADPH o>             | Q96PH1 (I22632970    | _NA_                   |
| The preser  | Dual oxid            | eQ9NRD9 (22632970    | _NA_                   |
| The preser  | Dual oxid            | eQ9NRD8 (22632970    | _NA_                   |
| _NA_        | Glucose-6            | P11413 (G22632970    | _NA_                   |
| _NA_        | 6-phosph             | rP52209 (G22632970   | _NA_                   |
| _NA_        | Voltage-d            | P45880 (V22632970    | _NA_                   |
| Also invol  | Phosphat             | iP42336 (P 24739485  | PI3Kalpha in article   |
| Also invol  | Receptor-            | P36888 (F124739485   | _NA_                   |
| Transient   | εNon-speci           | P22307 (N25402683    | _NA_                   |
| The acetyl  | Cellular tu          | P04637 (P:25799988   | _NA_                   |
| Author pr   | eLong-chai           | O60488 (A25965523    | _NA_                   |
| Author pr   | eLysophos            | Q6P1A2 (F25965523    | _NA_                   |
| Inferred    | asGTPase             | NFP01111 (R.26157704 | _NA_                   |
| Inferred    | asGTPase             | KFP01116 (R.26157704 | _NA_                   |
| Inferred    | asGTPase             | HFP01112 (R.26157704 | _NA_                   |
| _NA_        | Serotransf           | P02787 (T 26166707   | Transferrin in article |
| _NA_        | Transferrir          | P02786 (T 26166707   | Tfr in article         |
| _NA_        | Transferrir          | Q9UP52 (I26166707    | Tfr in article         |
| _NA_        | Sodium-α             | Q9H2H9 (I:26166707   | _NA_                   |
| _NA_        | Neutral an           | Q15758 (A26166707    | _NA_                   |
| _NA_        | Glutamina            | Q9UI32 (G26166707    | _NA_                   |
| _NA_        | Aspartate            | P17174 (A26166707    | _NA_                   |
| _NA_        | Cysteine--           | P49589 (S'26184909   | CARS in article        |
| _NA_        | Cellular tu          | P04637 (P:26218928   | p53 in article         |
| _NA_        | Arachidon            | P09917 (L26235588    | 5-LOX in article       |
| _NA_        | Kelch-like           | Q14145 (K26403645    | _NA_                   |
| Other artic | Heme oxy             | P09601 (H26405158    | HO-1 in article        |
| _NA_        | Cellular tu          | P04637 (P:26943586   | p53 in article         |
| _NA_        | Cellular tu          | P04637 (P:27034505   | p53 in article         |
| _NA_        | Glutamina            | Q9UI32 (G27034505    | _NA_                   |
| _NA_        | Autophag             | Q9H1Y0 (I27245739    | _NA_                   |

\_NA\_ Ubiquitin-O95352 (A27245739 \_NA\_  
 \_NA\_ Nuclear reQ13772 (N27245739 \_NA\_  
 \_NA\_ SerotransfP02787 (T27441659 Transferrin in article  
 \_NA\_ ArachidonP09917 (L27506793 \_NA\_  
 \_NA\_ ArachidonP18054 (L27506793 \_NA\_  
 \_NA\_ ArachidonO75342 (L27506793 \_NA\_  
 \_NA\_ ArachidonP16050 (L27506793 \_NA\_  
 \_NA\_ ArachidonO15296 (L27506793 \_NA\_  
 \_NA\_ HydropercQ9BYJ1 (L27506793 \_NA\_  
 \_NA\_ PhosphoryP15735 (P27506793 \_NA\_  
 \_NA\_ TransferrinP02786 (T27514700 \_NA\_  
 \_NA\_ CytoplasmP21399 (A27514700 \_NA\_  
 \_NA\_ Iron-respcP48200 (I27514700 \_NA\_  
 \_NA\_ Sodium-cQ9H2H9 (I27514700 \_NA\_  
 \_NA\_ GlutaminaQ9UI32 (G27514700 \_NA\_  
 \_NA\_ \_NA\_ \_NA\_ 27514700 Not found in HGNC  
 \_NA\_ Serine/thrO75385 (L27514700 \_NA\_  
 \_NA\_ Ubiquitin-Q9NT62 (I27514700 \_NA\_  
 \_NA\_ Cysteine pQ86TL0 (A27514700 \_NA\_  
 \_NA\_ AutophagQ9H1Y0 (I27514700 \_NA\_  
 \_NA\_ Beclin-1 Q14457 (E27514700 \_NA\_  
 \_NA\_ MicrotubuQ9H492 (I27514700 \_NA\_  
 \_NA\_ Gamma-aP60520 (G27514700 \_NA\_  
 \_NA\_ Gamma-aQ9H0R8 (L27514700 \_NA\_  
 \_NA\_ AutophagQ676U5 (I27514700 \_NA\_  
 \_NA\_ WD repeaQ5MNZ9 (I27514700 \_NA\_  
 \_NA\_ WD repeaQ9Y4P8 (V27514700 \_NA\_  
 \_NA\_ Sorting neO95219 (S27514700 \_NA\_  
 \_NA\_ AutophagO75143 (A27514700 \_NA\_  
 \_NA\_ Serine/thrQ8IYT8 (U27514700 \_NA\_  
 \_NA\_ Nuclear reQ13772 (N27514700 \_NA\_  
 \_NA\_ Long-chaiO60488 (A27565726 \_NA\_  
 \_NA\_ Cellular tuP04637 (P27705786 \_NA\_  
 Activated IDiamine aP21673 (S27698118 \_NA\_  
 \_NA\_ ArachidonP16050 (L27698118 \_NA\_  
 \_NA\_ Long-chaiO60488 (A27842066 \_NA\_  
 \_NA\_ LysophosQ6P1A2 (I27842066 \_NA\_  
 \_NA\_ ArachidonP16050 (L27842066 15-LOX in article  
 \_NA\_ Long-chaiO60488 (A27842070 \_NA\_  
 \_NA\_ Kelch-like Q14145 (K28012440 \_NA\_  
 \_NA\_ Epidermal P00533 (E28297659 \_NA\_  
 \_NA\_ NADPH oxQ9NPH5 (I28297659 \_NA\_  
 \_NA\_ Mitogen-εP27361 (N28297659 ERK1 in article

\_NA\_ Mitogen-εP28482 (N28297659 ERK2 in article  
 \_NA\_ BH3-inter:P55957 (B 28384611 \_NA\_  
 \_NA\_ Long-chaiO60488 (A28551825 \_NA\_  
 \_NA\_ Zinc fingerP37275 (Z 28678785 \_NA\_  
 \_NA\_ Kelch-like Q14145 (K28805788 \_NA\_  
 \_NA\_ DipeptidylP27487 (D28813679 \_NA\_  
 \_NA\_ ArachidonP16050 (L28837253 \_NA\_  
 \_NA\_ ArachidonP18054 (L28837253 \_NA\_  
 \_NA\_ Cyclin-de:P42771 (C 28985506 ARF in article  
 \_NA\_ PhosphatidP30086 (P 29053969 \_NA\_  
 \_NA\_ SuppressoO15524 (S29081404 \_NA\_  
 \_NA\_ Cysteine dQ16878 (C29144989 \_NA\_  
 \_NA\_ TranscriptiP10242 (N29144989 C-Myb in article  
 \_NA\_ Heme oxyP09601 (H29274359 HO-1 in article  
 \_NA\_ Mitogen-εP45983 (N29330409 JNK1 in article  
 \_NA\_ Mitogen-εP45984 (N29330409 JNK2 in article  
 \_NA\_ Mitogen-εP28482 (N29330409 ERK2 in article  
 \_NA\_ Mitogen-εP27361 (N29330409 ERK1 in article  
 \_NA\_ Neutral anQ15758 (A29348676 \_NA\_  
 \_NA\_ GlutathionQ9BUX1 (I29383104 \_NA\_  
 \_NA\_ Mitogen-εQ16539 (N29436589 p38 MAPK in article  
 Also triggePputative uQ9H8W2 (29588351 P53RRA in article  
 \_NA\_ NADPH oQ9NPH5 ( 29702192 \_NA\_  
 \_NA\_ Aspartate P17174 (A 30035324 \_NA\_  
 \_NA\_ Beclin-1 Q14457 (E30057310 \_NA\_  
 \_NA\_ 5'-AMP-aP54646 (A 30057310 PRKAA in article  
 \_NA\_ 5'-AMP-aQ13131 (A30057310 AMPK alpha in article  
 \_NA\_ ELAV-like Q15717 (E30081711 \_NA\_  
 \_NA\_ Ubiquitin cQ92560 (E30202049 \_NA\_  
 \_NA\_ Cellular tuP04637 (P30321484 P53 in article  
 \_NA\_ Multidrug P33527 (N30726737 MRP1 in article  
 \_NA\_ Long-chaiO60488 (A30737476 \_NA\_  
 \_NA\_ \_NA\_ \_NA\_ 30787392 \_NA\_  
 \_NA\_ Activin recP36896 (A30804470 ALK4 in article  
 \_NA\_ TGF-beta P36897 (T30804470 ALK5 in article  
 \_NA\_ Ubiquitin cQ92560 (E30907299 \_NA\_  
 \_NA\_ EndotheliaQ99814 (E30962421 HIF-2alpha in article  
 \_NA\_ Hypoxia-irQ9Y5L2 (F30962421 \_NA\_  
 \_NA\_ Hypoxia-irQ16665 (F30962421 HIF-1alpha in article  
 \_NA\_ ArachidonP18054 (L30962574 \_NA\_  
 \_NA\_ Long-chaiO60488 (A30962574 \_NA\_  
 \_NA\_ Heme oxyP09601 (H31036877 \_NA\_  
 \_NA\_ Interferon P01579 (IF31043744 IFNgamma in article

\_NA\_ Anoctamin Q4KMQ2 (I31060306 \_NA\_  
 \_NA\_ Phosphatidylserine Q14693 (L31061954 \_NA\_  
 \_NA\_ High mobility group protein B1 P09429 (H31105999 \_NA\_  
 \_NA\_ Tumor necrosis factor receptor type 1 P21580 (T31160087 Zinc lipoprotein A20 in article  
 \_NA\_ Toll-like receptor 1 O00206 (T31196626 \_NA\_  
 \_NA\_ NADPH oxidase 1 Q9NPH5 (I31196626 \_NA\_  
 \_NA\_ Cyclic AMP response element binding protein 1 P18847 (A31273299 \_NA\_  
 \_NA\_ Serine protease 1 Q13315 (A31320750 \_NA\_  
 \_NA\_ YY1-associated protein 1 Q9H869 (I31341276 YAP in article  
 \_NA\_ Egl nine homolog 1 Q96KS0 (E31355331 \_NA\_  
 \_NA\_ Inositol 1,4,5-bisphosphate 3-kinase A class 1 beta Q9UGB7 (I31437128 \_NA\_  
 \_NA\_ Tafazzin Q16635 (T31484063 \_NA\_  
 \_NA\_ Protein LYQ86UE4 (L31527591 \_NA\_  
 \_NA\_ Isocitrate dehydrogenase 2 alpha Q75874 (I31591388 \_NA\_  
 \_NA\_ NAD-dependent histone deacetylase 1 Q96EB6 (S31610175 \_NA\_  
 \_NA\_ Tafazzin Q16635 (T31641008 \_NA\_  
 \_NA\_ Beclin-1 Q14457 (E31650158 Beclin1 in article  
 \_NA\_ F-box and WD domain-containing protein 7 Q969H0 (F31679460 \_NA\_  
 \_NA\_ Pannexin-1 Q96RD7 (F31694915 \_NA\_  
 \_NA\_ DnaJ homolog 1 O75190 (L31701262 \_NA\_  
 \_NA\_ Transcription factor 1 O14867 (E31740582 \_NA\_  
 \_NA\_ Long-chain fatty acid oxidase 1 O60488 (A31789401 \_NA\_  
 \_NA\_ Lon protease P36776 (L31822343 \_NA\_  
 Prostaglandin synthase P35354 (P24439385 May promote ferroptosis.  
 Dual specificity phosphatase 2 P28562 (D24439385 May promote ferroptosis.  
 Nitric oxide synthase 2 P35228 (N24439385 May promote ferroptosis.  
 Neutrophil gelatinase-associated lipocalin P19878 (N24439385 May promote ferroptosis.  
 Metallothionein 1B P25713 (N24439385 May promote ferroptosis.  
 Polyubiquitin P0CG48 (L24439385 May promote ferroptosis.  
 Serum albumin P02768 (A24439385 May promote ferroptosis.  
 Thioredoxin Q16881 (T24439385 May promote ferroptosis.  
 Sulfiredoxin Q9BYN0 (I24439385 May promote ferroptosis.  
 Glutathione peroxidase 1 P18283 (G24439385 May promote ferroptosis.  
 BCL2/adenosine 1 Q12983 (E24439385 May promote ferroptosis.  
 Serine/threonine kinase 1 O95747 (C24439385 May promote ferroptosis.  
 Selenoprotein Q9BQE4 (I24439385 SELS in article. May promote ferroptosis.  
 Angiopoietin 1 O43827 (A24439385 May promote ferroptosis.  
 Glutathione S-transferase Q9BUX1 (I24844246 \_NA\_  
 Cystine/glutamate transporter-like protein Q9UPY5 (I24844246 May inhibit ferroptosis.  
 DNA damage-inducible protein 1 Q9NX09 (I24844246 May promote ferroptosis.  
 \_NA\_ \_NA\_ 24844246 Not found in HGNC. May promote ferroptosis.  
 Asparaginase P08243 (A24844246 May promote ferroptosis.  
 TSC2 domain-containing protein Q99576 (T24844246 May promote ferroptosis.

DDIT3 upsP0DPQ6 (I24844246 May promote ferroptosis.  
Jun dimeriQ8WYK2 ( 24844246 May promote ferroptosis.  
Sestrin-2 P58004 (S|24844246 May promote ferroptosis.  
Neutral anP43007 (S,24844246 May promote ferroptosis.  
PhosphoeiQ16822 (F24844246 May promote ferroptosis.  
ThioredoxiQ9H3M7 (24844246 May promote ferroptosis.  
Very low- $\alpha$ P98155 (V24844246 May promote ferroptosis.  
Alanine anQ8TD30 (/24844246 May promote ferroptosis.  
Phosphos $\epsilon$ Q9Y617 (S24844246 May promote ferroptosis.  
Leucine ricQ8IV03 (LI24844246 C9ORF150 in article. May promote ferroptosis.  
Large neuIQ01650 (L24844246 May promote ferroptosis.  
HomocystQ15011 (F24844246 May promote ferroptosis.  
X-box-binP17861 (X24844246 May promote ferroptosis.  
Cyclic AMIP18847 (A24844246 May promote ferroptosis.  
4F2 cell-stP08195 (4|24844246 May promote ferroptosis.  
CystathiorP35520 (C24844246 May promote ferroptosis.  
Cyclic AMIP18848 (A24844246 May promote ferroptosis.  
Zinc fingerQ96HQ0 ( 24844246 May promote ferroptosis.  
Kelch-like Q6TFL4 (K24844246 May promote ferroptosis.  
Tribbles hcQ96RU7 (T24844246 May promote ferroptosis.  
Zinc fingerQ9UJL9 (Z24844246 ZNF643 in article. May promote ferroptosis.  
V-type prcO95670 (V24844246 May promote ferroptosis.  
Vascular eP15692 (V24844246 May promote ferroptosis.  
Growth/diQ99988 (C24844246 May promote ferroptosis.  
Tubulin epQ9UJT0 (T24844246 May promote ferroptosis.  
Arrestin dkQ96B67 (/24844246 May promote ferroptosis.  
CCAAT/enP53567 (C24844246 May promote ferroptosis.  
\_NA\_ \_NA\_ 24844246 May inhibit ferroptosis.  
Regulator P49798 (R24844246 May inhibit ferroptosis.  
\_NA\_ \_NA\_ 24844246 MUTED-TXNDC5 in article. May inhibit ferroptosis.  
\_NA\_ \_NA\_ 24844246 Not found in HGNC. May inhibit ferroptosis.  
EukaryoticP05198 (IF24844246 eIF2 $\alpha$  in article. May promote ferroptosis.  
\_NA\_ \_NA\_ 25385600 Not found in HGNC. May promote ferroptosis.  
InterleukinP05231 (IL25385600 IL-6 in article. May promote ferroptosis.  
C-X-C mcP19875 (C25385600 May promote ferroptosis.  
TranscriptiQ04206 (T25385600 p65 in article. May promote ferroptosis.  
Estradiol 1Q8NBQ5 (25965523 May promote ferroptosis.  
1-acyl-sn-Q9NRZ7 (I25965523 May promote ferroptosis.  
Histone-lyQ9UPS6 ( $\xi$ 25965523 May promote ferroptosis.  
Heme oxyP09601 (H26097885 HO-1 in article. May promote ferroptosis.  
SerotransfP02787 (T|26097885 May promote ferroptosis.  
Ferritin ligP02792 (FI26097885 May promote ferroptosis.  
60S riboscP62917 (R26097885 May promote ferroptosis.

ATP synth: P48201 (A26097885 ATP5G3 in article. May promote ferroptosis.  
Transferrin: P02786 (T26097885 May inhibit ferroptosis.  
Transcript: O15525 (N26403645 May inhibit ferroptosis.  
Interleukin: O95760 (I27352622 IL-33 in article. May promote ferroptosis.  
Ferritin he: P02794 (F27514700 \_NA\_  
Solute carrier: Q9NP59 (S27773819 May promote ferroptosis.  
Serotransferrin: P02787 (T27773819 May promote ferroptosis.  
Transferrin: P02786 (T27773819 May promote ferroptosis.  
Ferritin he: P02794 (F27773819 May inhibit ferroptosis.  
Phospholipase: P36969 (G27773819 May inhibit ferroptosis.  
Hepcidin: P81172 (H27773819 May inhibit ferroptosis.  
Heat shock protein: P04792 (H27773819 May inhibit ferroptosis.  
Nuclear factor: Q16236 (N27773819 NRF2 in article. May inhibit ferroptosis.  
Metalloreductase: Q658P3 (S27773819 May inhibit ferroptosis.  
D(1B) dopamine transporter: P21918 (D27793671 May promote ferroptosis.  
Phospholipase: P36969 (G27793671 May inhibit ferroptosis.  
D(4) dopamine transporter: P21917 (D27793671 May inhibit ferroptosis.  
Mitogen-activated protein kinase: Q99683 (N28887319 ASK1 in article. May promote ferroptosis.  
Mitogen-activated protein kinase: Q16539 (N28887319 p38 in article. May promote ferroptosis.  
Solute carrier: P11166 (G28900510 GLUT1 in article. May inhibit ferroptosis.  
Solute carrier: P11169 (G28900510 GLUT3 in article. May inhibit ferroptosis.  
Solute carrier: Q9UGQ3 (28900511 GLUT6 in article. May inhibit ferroptosis.  
Solute carrier: Q9NY64 (C28900512 GLUT8 in article. May inhibit ferroptosis.  
Solute carrier: Q8TD20 (C28900513 GLUT12 in article. May inhibit ferroptosis.  
\_NA\_ \_NA\_ 28900514 Not found in HGNC. May inhibit ferroptosis.  
Solute carrier: Q8TDB8 (C28900515 GLUT14 in article. May inhibit ferroptosis.  
eIF-2-alpha: Q9P2K8 (E29383104 GCN2 in article. May promote ferroptosis.  
Eukaryotic translation initiation factor: P05198 (I29383104 eIF2alpha in article. May promote ferroptosis.  
Cyclic AMP-dependent protein kinase: P18848 (A29383104 May promote ferroptosis.  
Arachidonate 5-lipoxygenase: P09917 (L29632885 5-LOX in article  
Arachidonate 12-lipoxygenase: P18054 (L29632885 p12-LOX in article  
Arachidonate 15-lipoxygenase-1: P16050 (L29632885 15-LOX-1 in article  
Arachidonate 5-lipoxygenase: P09917 (L30294906 May promote ferroptosis.  
Medium-chain acyl-CoA oxidase: Q96CM8 (30539824 There is a corrigendum for this article. May promote ferroptosis.  
Iron-responsive element-binding protein: P48200 (I30539824 There is a corrigendum for this article. May promote ferroptosis.  
Phospholipase: P36969 (G30539824 There is a corrigendum for this article.  
High mobility group protein: P09429 (H30686534 May promote ferroptosis.  
Heme oxygenase: P09601 (H30692261 May promote ferroptosis.  
Nuclear factor: Q16236 (N30692261 NRF2 in article.  
ELAV-like protein: Q15717 (E30787392 May inhibit ferroptosis.  
4F2 cell-surface protein: P08195 (A31043744 May inhibit ferroptosis.  
Cystine/glutamate transporter: Q9UPY5 (G31043744 May inhibit ferroptosis.  
Transcript: Q92754 (A31056284 May inhibit ferroptosis.

TranscriptiP08047 (S131056284 May inhibit ferroptosis.  
 HemoglotP69905 (H31108460 May promote ferroptosis.  
 NicotinamP40261 (N31108460 May promote ferroptosis.  
 Perilipin-4Q96Q06 (I31108460 May promote ferroptosis.  
 HypermetlQ14526 (F31108460 May promote ferroptosis.  
 Stathmin P16949 (S31108460 May inhibit ferroptosis.  
 RibonucleP31350 (R31108460 May inhibit ferroptosis.  
 Macrophap40121 (C31108460 May inhibit ferroptosis.  
 HepatocytP41235 (H31108460 May inhibit ferroptosis.  
 NeuroglotQ9NPG2 (31405213 May inhibit ferroptosis.  
 14-3-3 prP62258 (131581313 14-3-3epsilon in article. May promote ferroptosis.  
 GA-bindinQ06547 (C31700067 May inhibit ferroptosis.  
 Aurora kinO14965 (A31740746 May inhibit ferroptosis.  
 \_NA\_ \_NA\_ 31740746 miR-4715-3p in article. May promote ferroptosis.  
 Receptor-Q13546 (F31827280 May promote ferroptosis.  
 PeroxiredcQ06830 (F31901729 May promote ferroptosis.  
 \_NA\_ \_NA\_ 31926626 miR-30b-5p in article. May promote ferroptosis.  
 \_NA\_ Cystine/gliQ9UPY5 (22632970 \_NA\_  
 \_NA\_ PhospholiP36969 (G24439385 \_NA\_  
 \_NA\_ Aldo-ketoQ04828 (A24844246 \_NA\_  
 \_NA\_ Aldo-ketoP52895 (A24844246 \_NA\_  
 \_NA\_ Aldo-ketoP42330 (A24844246 \_NA\_  
 \_NA\_ PhospholiP36969 (G25402683 \_NA\_  
 \_NA\_ RetinoblasP06400 (R25444922 \_NA\_  
 \_NA\_ Heat shocP04792 (H25728673 \_NA\_  
 \_NA\_ Heat shocQ00613 (F25728673 \_NA\_  
 \_NA\_ Cystine/gliQ9UPY5 (25799988 \_NA\_  
 \_NA\_ PhospholiP36969 (G25824823 \_NA\_  
 \_NA\_ GlutamateP48506 (G26166707 \_NA\_  
 \_NA\_ Cystine/gliQ9UPY5 (26218928 \_NA\_  
 \_NA\_ Nuclear faQ16236 (N26403645 NRF2 in article  
 \_NA\_ SequestosQ13501 (S26403645 p62 in article.  
 \_NA\_ NAD(P)H cP15559 (N26403645 \_NA\_  
 Article (PMHeme oxyP09601 (H26403645 HO1 in article  
 \_NA\_ Ferritin he.P02794 (F26403645 \_NA\_  
 \_NA\_ Mucin-1 P15941 (M26930718 \_NA\_  
 \_NA\_ 4F2 cell-stP08195 (426945935 CD98hc in article  
 \_NA\_ MetallothiP13640 (M27015352 MT-1G in article  
 Its ability t Nuclear faQ16236 (N27015352 NRF2 in article  
 \_NA\_ Solute carQ9NP59 (27441659 Ferroportin-1 (FPN) in article  
 \_NA\_ Cystine/gliQ9UPY5 (27441659 \_NA\_  
 \_NA\_ PhospholiP36969 (G27441659 \_NA\_  
 \_NA\_ Cystine/gliQ9UPY5 (27477897 \_NA\_



\_NA\_ CDGSH ircQ9NZ45 ((27510639 \_NA\_  
 \_NA\_ Cystine/gliQ9UPY5 (27705786 \_NA\_  
 \_NA\_ Fanconi arQ9BXW9 (27773819 \_NA\_  
 \_NA\_ PhospholipP36969 (G27964880 \_NA\_  
 \_NA\_ Nuclear faQ16236 (N28012440 NRF2 in article  
 \_NA\_ Ferritin Q8N4E7 (F28066232 \_NA\_  
 \_NA\_ EndoplasmP11021 (B28130223 \_NA\_  
 \_NA\_ Cyclic AMIP18848 (A28130223 \_NA\_  
 \_NA\_ Cystine/gliQ9UPY5 (28195347 \_NA\_  
 \_NA\_ PhospholipP36969 (G28212525 \_NA\_  
 \_NA\_ PhospholipP36969 (G28297659 \_NA\_  
 Article (PMHeme oxyP09601 (H28515173 HO-1 in article  
 \_NA\_ Cyclic AMIP18848 (A28553953 \_NA\_  
 \_NA\_ Nuclear faQ16236 (N28805788 Nrf2 in article  
 Promotes Cellular tuP04637 (P28813679 \_NA\_  
 \_NA\_ Cystine/gliQ9UPY5 (28813679 \_NA\_  
 \_NA\_ Lymphoid Q9NRZ9 (I28900510 LSH in article  
 \_NA\_ Acyl-CoA O00767 (F28900510 SCD1 in article  
 \_NA\_ Acyl-CoA O95864 (F28900510 \_NA\_  
 \_NA\_ Proto-oncP12931 (S28972104 \_NA\_  
 \_NA\_ Signal transP40763 (S28972104 \_NA\_  
 \_NA\_ Nuclear faQ16236 (N28985506 NRF2 in article  
 \_NA\_ Protein PMP29590 (P29081404 \_NA\_  
 \_NA\_ Serine/thrP42345 (M29127238 \_NA\_  
 \_NA\_ Cysteine dQ9Y697 (N29168506 \_NA\_  
 \_NA\_ Tumor prcQ9H3D4 (29212036 Delta Np63 alpha in article  
 \_NA\_ Cystine/gliQ9UPY5 (29274359 \_NA\_  
 Found to Cellular tuP04637 (P29346757 p53 in article  
 \_NA\_ Cyclin-deP38936 (C29346757 Encoding p21  
 \_NA\_ \_NA\_ \_NA\_ 29348676 \_NA\_  
 \_NA\_ Solute carQ9NP59 (29436589 Fpn in article  
 \_NA\_ PhospholipP36969 (G29436589 \_NA\_  
 The autho PhospholipP36969 (G29463878 \_NA\_  
 \_NA\_ EctonuclecQ13822 (E29551679 \_NA\_  
 \_NA\_ Voltage-dP45880 (V29569437 \_NA\_  
 \_NA\_ Fumarate P07954 (F29917289 \_NA\_  
 \_NA\_ CDGSH ircQ8N5K1 ((29928961 \_NA\_  
 \_NA\_ Solute carQ9NP59 (29949159 Ferroportin in article  
 \_NA\_ \_NA\_ \_NA\_ 30035324 miR-9 in article  
 \_NA\_ \_NA\_ \_NA\_ 30035324 miR-9 in article  
 \_NA\_ \_NA\_ \_NA\_ 30035324 miR-9 in article  
 \_NA\_ CystathionP35520 (C30258181 \_NA\_  
 \_NA\_ Nuclear faQ16236 (N30339884 Nrf2 in article

Not test cSequestos Q13501 (S30339884 p62 in article.

\_NA\_ PhospholipP36969 (G30524291 \_NA\_

\_NA\_ Iron-sulfurQ9H1K1 (I30557609 \_NA\_

\_NA\_ Ferritin he.P02794 (F30557609 FTH in article

\_NA\_ Long-chai Q95573 (A30686757 \_NA\_

\_NA\_ Ubiquitin tQ96FW1 (I30709928 \_NA\_

\_NA\_ CD44 antiP16070 (C30709928 \_NA\_

\_NA\_ Putative uiQ6ZUF6 (I30787392 \_NA\_

\_NA\_ Signal trarP40763 (S30811078 \_NA\_

\_NA\_ BromodorO60885 (E30988278 \_NA\_

\_NA\_ PeroxiredcP30041 (P31036877 \_NA\_

\_NA\_ \_NA\_ \_NA\_ 31160087 miR-17-92 in article

\_NA\_ Acyl-CoA O00767 (A31270077 SCD1 in article

\_NA\_ Sestrin-2 P58004 (S131323261 Sesn2 in article

\_NA\_ Merlin P35240 (M31341276 Also known as merlin

\_NA\_ Aryl hydroO00327 (E31355331 \_NA\_

\_NA\_ Hypoxia-irQ16665 (F31355331 \_NA\_

\_NA\_ TranscriptiP05412 (JL31394193 c-Jun in article

\_NA\_ Carbonic εQ16790 (C31442913 \_NA\_

\_NA\_ EndoplasnP11021 (B31456633 GRP78 in article

\_NA\_ Protein lifeQ9HC24 (I31507082 S1R in article

\_NA\_ EndoplasnP11021 (B31519193 \_NA\_

\_NA\_ Perilipin-2Q99541 (F31520166 Also known as ADRP

\_NA\_ \_NA\_ \_NA\_ 31533781 miR-212-5p in article

\_NA\_ Ferritin H1UUD2 (31568497 \_NA\_

\_NA\_ Apoptosis Q9BRQ8 (31634899 FSP1 in article

\_NA\_ Apoptosis Q9BRQ8 (31634900 FSP1 in article

\_NA\_ Lysosome P13473 (L31672277 \_NA\_

\_NA\_ mRNA decP26651 (T31679460 \_NA\_

\_NA\_ PhospholipP36969 (G31685805 \_NA\_

\_NA\_ Prominin- Q8N271 (F31735663 Prominin2 in article

\_NA\_ Charged nQ9NZZ3 (I31761326 \_NA\_

\_NA\_ Charged nQ96FZ7 (C31761326 \_NA\_

\_NA\_ Aldo-keto Q04828 (A31780644 \_NA\_

\_NA\_ Aldo-keto P52895 (A31780644 \_NA\_

\_NA\_ Aldo-keto P42330 (A31780644 \_NA\_

\_NA\_ CystathionP35520 (C31819185 \_NA\_

\_NA\_ Nuclear faQ16236 (F31819185 NRF2 in article

\_NA\_ Caveolin-1Q03135 (C31877357 Cav-1 in article

\_NA\_ GTP cyclotP30793 (G31989025 \_NA\_











3.

3.
