# Supplementary material for: A Novel Prognostic Ferroptosis-Related lncRNA Signature Associated with Immune Landscape in Invasive Breast Cancer
Source: PubMed Central journal article supplement (PMC8961446; doi:10.1155/2022/9168556), 2022-03-20
Supplement: 9168556.f7.pdf [file 9168556.f7.pdf]

Table S2:ferroptosis-related lncRNA were differentially expressed

| gene      | conMean  | treatMean | logFC    | pValue   | fdr      |
|-----------|----------|-----------|----------|----------|----------|
| LINC02716 | 0.82256  | 0.257646  | -1.67473 | 1.28E-27 | 9.55E-27 |
| MYOSLID   | 0.569478 | 0.277352  | -1.03792 | 3.72E-21 | 1.72E-20 |
| CYTOR     | 2.238146 | 4.711003  | 1.07373  | 3.32E-27 | 2.37E-26 |
| CDKN2B-AS | 0.059682 | 0.253717  | 2.087841 | 2.58E-38 | 4.14E-37 |
| TPT1-AS1  | 2.827375 | 0.963909  | -1.5525  | 1.51E-43 | 3.65E-42 |
| LINC00924 | 0.81831  | 0.164801  | -2.31192 | 4.98E-53 | 2.80E-51 |
| LINC02202 | 1.490435 | 0.184053  | -3.01754 | 5.22E-62 | 1.61E-59 |
| LMNTD2-AS | 0.693413 | 2.103086  | 1.600722 | 4.83E-10 | 1.04E-09 |
| AC121247. | 0.582099 | 0.186998  | -1.63824 | 5.42E-39 | 9.57E-38 |
| AC099684. | 0.107475 | 0.227436  | 1.081454 | 0.027263 | 0.0317   |
| AC005544. | 0.128018 | 0.399742  | 1.642723 | 7.26E-08 | 1.36E-07 |
| A2M-AS1   | 1.411118 | 0.590681  | -1.25639 | 1.11E-46 | 3.82E-45 |
| AC106782. | 0.755304 | 1.682357  | 1.155355 | 3.02E-17 | 1.04E-16 |
| LINC01569 | 0.948716 | 1.983779  | 1.064203 | 3.34E-21 | 1.55E-20 |
| DLEU2     | 0.399191 | 0.923729  | 1.21039  | 5.33E-31 | 4.88E-30 |
| AC233992. | 0.080095 | 0.307111  | 1.938984 | 1.22E-22 | 6.33E-22 |
| AC093110. | 2.652573 | 0.532947  | -2.31533 | 1.55E-52 | 8.33E-51 |
| U62317.1  | 0.492388 | 3.70504   | 2.911622 | 1.11E-30 | 9.83E-30 |
| AC107214. | 0.291234 | 0.61107   | 1.069157 | 1.46E-17 | 5.10E-17 |
| MIR200CHG | 5.130717 | 11.2867   | 1.137391 | 1.90E-16 | 6.22E-16 |
| AC144450. | 0.437776 | 1.077341  | 1.299209 | 3.68E-09 | 7.53E-09 |
| AL049539. | 0.070788 | 0.270813  | 1.935726 | 3.59E-09 | 7.37E-09 |
| AC245884. | 0.11018  | 0.261314  | 1.245919 | 0.008088 | 0.009928 |
| MIR99AHG  | 2.214714 | 0.618339  | -1.84065 | 2.46E-60 | 4.34E-58 |
| AL139246. | 0.442893 | 1.671502  | 1.916114 | 5.08E-24 | 2.96E-23 |
| AC006946. | 0.789403 | 0.351008  | -1.16926 | 4.56E-25 | 2.85E-24 |
| AF131215. | 2.253314 | 0.84233   | -1.41959 | 1.85E-36 | 2.44E-35 |
| AF015262. | 0.01701  | 0.251573  | 3.886535 | 9.81E-19 | 3.81E-18 |
| LINC00641 | 3.517679 | 1.368358  | -1.36218 | 5.59E-49 | 2.16E-47 |
| MAL2-AS1  | 0.059316 | 0.228208  | 1.943853 | 5.96E-12 | 1.46E-11 |
| ZNF350-AS | 0.361745 | 1.42026   | 1.973109 | 0.000252 | 0.000358 |
| GAS1RR    | 0.992551 | 0.210338  | -2.23843 | 5.99E-56 | 5.70E-54 |
| AC067817. | 0.569548 | 0.211319  | -1.43039 | 5.48E-33 | 5.69E-32 |
| AP005131. | 0.191987 | 0.825567  | 2.104378 | 3.03E-23 | 1.69E-22 |
| AC004585. | 0.234566 | 0.861445  | 1.876766 | 2.29E-28 | 1.76E-27 |
| LINC0210C | 0.130213 | 0.335767  | 1.366594 | 1.73E-05 | 2.74E-05 |
| AC092171. | 0.268966 | 0.740906  | 1.461866 | 1.76E-27 | 1.30E-26 |
| AC064799. | 0.052352 | 0.627296  | 3.582823 | 0.014368 | 0.017254 |
| AC105137. | 0.092957 | 0.259634  | 1.481851 | 3.15E-23 | 1.74E-22 |
| FARSA-AS1 | 0.061676 | 0.219731  | 1.832965 | 7.62E-06 | 1.24E-05 |
| LINC00922 | 0.024513 | 0.55973   | 4.513117 | 1.31E-53 | 8.07E-52 |
| EMX2OS    | 1.11975  | 0.251162  | -2.15649 | 1.01E-42 | 2.26E-41 |
| AL365436. | 0.098224 | 0.448575  | 2.191209 | 1.09E-17 | 3.83E-17 |
| AC037198. | 1.046288 | 4.018546  | 1.941394 | 3.13E-11 | 7.39E-11 |
| UBE2Q1-AS | 0.174783 | 0.381724  | 1.126964 | 2.05E-15 | 6.25E-15 |
| AL356215. | 0.184969 | 0.409422  | 1.146308 | 0.000729 | 0.001003 |
| LINC01235 | 5.674947 | 2.014265  | -1.49435 | 2.30E-31 | 2.19E-30 |
| YTHDF3-AS | 0.902779 | 1.866695  | 1.048041 | 6.14E-13 | 1.62E-12 |
| AC245014. | 0.295585 | 0.651164  | 1.139449 | 0.000446 | 0.000621 |

LINC01705 0.023258 1.209578 5.700618 7.66E-56 6.31E-54  
LAMC1-AS1 1.111548 0.375609 -1.56527 1.04E-40 2.01E-39  
SOX9-AS1 1.454946 0.560023 -1.37741 1.09E-26 7.26E-26  
AL451050. 0.126064 0.345931 1.456332 7.93E-20 3.35E-19  
AL133230. 0.095638 0.270025 1.497438 1.44E-05 2.29E-05  
EMSLR 1.228518 3.280109 1.416825 4.98E-16 1.59E-15  
AC062004. 0.888567 0.270231 -1.71729 7.58E-36 9.37E-35  
LINC01614 0.202066 8.924098 5.46481 8.16E-63 1.01E-59  
AC105219. 0.051195 0.65021 3.666818 1.43E-33 1.52E-32  
AC020663. 0.221412 0.876876 1.985638 6.04E-36 7.61E-35  
AC132192. 0.513891 1.105042 1.104566 2.64E-21 1.24E-20  
AC124312. 1.38052 0.667115 -1.0492 7.98E-27 5.33E-26  
AC024075. 4.602156 2.16298 -1.08929 1.39E-29 1.15E-28  
AC009133. 0.72252 1.575613 1.124803 3.49E-45 1.00E-43  
AC007285. 0.107437 0.26214 1.286847 1.22E-12 3.17E-12  
LINC01341 0.209657 0.461144 1.137187 1.04E-05 1.68E-05  
ETV7-AS1 0.15211 0.334567 1.137178 6.74E-06 1.10E-05  
AL359878. 0.10569 0.227628 1.106835 0.000131 0.000192  
AL158212. 2.180127 1.028133 -1.08438 3.06E-47 1.11E-45  
AC027228. 0.137949 0.379486 1.45991 1.02E-05 1.66E-05  
Z99289.1 0.505971 0.169716 -1.57593 5.69E-35 6.51E-34  
AL357992. 0.14784 0.577264 1.965196 2.55E-22 1.28E-21  
AP005131. 0.055011 0.336106 2.611126 0.032061 0.037139  
LINC00702 0.98487 0.354943 -1.47235 4.43E-24 2.61E-23  
AP003419. 0.407349 1.186337 1.542177 6.12E-14 1.73E-13  
VLDLR-AS1 0.576883 0.163216 -1.8215 1.53E-36 2.03E-35  
MIR4435-2 1.341948 2.730588 1.024883 1.23E-33 1.34E-32  
LINC02446 0.346742 0.932399 1.427083 0.014392 0.017254  
LINC02544 0.448953 5.346031 3.573833 5.29E-49 2.11E-47  
AC010331. 0.110254 0.459049 2.05782 1.09E-28 8.50E-28  
AC103769. 0.077359 0.251174 1.69904 0.009568 0.011663  
LYPLAL1-A 1.732947 0.471908 -1.87665 7.17E-39 1.23E-37  
BCL2L1-AS 0.139857 0.537517 1.94236 0.033208 0.038432  
CD2BP2-DT 1.780501 5.476307 1.62092 2.74E-31 2.59E-30  
MYB-AS1 0.126549 0.334953 1.404265 1.86E-05 2.94E-05  
CADM3-AS1 0.834681 0.141942 -2.55592 6.48E-56 5.72E-54  
AC006270. 0.064566 0.406234 2.653465 0.000505 0.0007  
AC011465. 0.137868 0.398977 1.53302 1.17E-07 2.16E-07  
AL023803. 0.030924 0.340528 3.460954 1.77E-45 5.22E-44  
AC006946. 1.045166 0.514786 -1.02169 4.23E-23 2.32E-22  
AL121829. 0.078383 0.312553 1.995481 6.58E-19 2.60E-18  
AC010503. 8.008529 18.15559 1.180805 7.02E-34 7.75E-33  
LINC02273 0.117999 0.249339 1.07933 0.037649 0.043287  
AC084125. 0.180082 0.54559 1.599164 9.01E-22 4.40E-21  
MIR100HG 5.43745 1.764481 -1.62369 5.83E-56 5.70E-54  
LINC01943 0.129221 0.495628 1.939419 2.40E-39 4.36E-38  
AC004816. 0.458542 0.201157 -1.18873 6.62E-28 4.99E-27  
PPP1R14B- 0.611005 2.127835 1.800131 3.44E-35 4.05E-34  
Clorf220 0.206485 0.478959 1.213869 3.08E-15 9.31E-15  
TRHDE-AS1 2.899746 0.079112 -5.19588 3.12E-55 2.15E-53  
CARMN 2.066636 0.286558 -2.85039 2.27E-58 2.81E-56

|           |          |          |          |          |          |
|-----------|----------|----------|----------|----------|----------|
| NRIR      | 0.185912 | 0.375294 | 1.013404 | 0.002723 | 0.003529 |
| AC007938. | 2.514325 | 0.859747 | -1.54819 | 1.02E-40 | 1.99E-39 |
| BRWD1-AS1 | 0.094673 | 0.232094 | 1.293685 | 1.04E-06 | 1.79E-06 |
| AC093535. | 0.868234 | 0.239019 | -1.86096 | 1.00E-32 | 1.01E-31 |
| MIR205HG  | 19.90148 | 7.755454 | -1.35959 | 4.14E-21 | 1.90E-20 |
| AC004884. | 0.104928 | 0.38084  | 1.859784 | 7.64E-06 | 1.24E-05 |
| SOCAR     | 0.047571 | 0.264087 | 2.472851 | 2.31E-37 | 3.44E-36 |
| AC108134. | 1.334625 | 0.468678 | -1.50977 | 2.65E-44 | 6.68E-43 |
| RBMS3-AS3 | 0.989074 | 0.168985 | -2.54918 | 9.70E-59 | 1.33E-56 |
| DNAH100S  | 0.469638 | 0.971433 | 1.048566 | 6.30E-11 | 1.46E-10 |
| AC011447. | 0.145229 | 0.302858 | 1.060311 | 1.62E-11 | 3.86E-11 |
| AP003555. | 1.844274 | 0.351297 | -2.39229 | 1.22E-32 | 1.21E-31 |
| MIAT      | 0.269291 | 0.753724 | 1.484873 | 1.07E-18 | 4.13E-18 |
| LINC00639 | 0.651441 | 0.253618 | -1.36098 | 3.68E-45 | 1.03E-43 |
| AL359715. | 0.529194 | 0.258905 | -1.03138 | 1.37E-29 | 1.13E-28 |
| LINC00511 | 0.112847 | 0.79407  | 2.814903 | 1.29E-30 | 1.13E-29 |
| USP30-AS1 | 0.430129 | 1.095811 | 1.34916  | 1.16E-08 | 2.30E-08 |
| AC105020. | 0.731902 | 0.328667 | -1.15502 | 2.15E-39 | 3.97E-38 |
| AL590133. | 0.128757 | 0.372382 | 1.532129 | 4.06E-19 | 1.63E-18 |
| LINC01929 | 0.055203 | 0.66318  | 3.586576 | 6.14E-39 | 1.07E-37 |
| PCAT6     | 2.379168 | 7.198252 | 1.597189 | 1.58E-35 | 1.90E-34 |
| SRRM2-AS1 | 0.218401 | 0.481317 | 1.140009 | 2.77E-19 | 1.13E-18 |
| AP005131. | 0.032939 | 0.304503 | 3.208587 | 0.039128 | 0.044904 |
| AL590226. | 0.942092 | 0.314469 | -1.58295 | 6.47E-40 | 1.23E-38 |
| AC010326. | 4.749327 | 11.10406 | 1.225293 | 4.65E-20 | 1.98E-19 |
| AC134312. | 0.088424 | 0.844005 | 3.254733 | 3.36E-50 | 1.54E-48 |
| LINC01857 | 0.392164 | 1.11476  | 1.507203 | 1.74E-23 | 9.95E-23 |
| AC096921. | 1.533181 | 0.331087 | -2.21125 | 2.62E-59 | 4.04E-57 |
| AP001528. | 6.732928 | 0.861631 | -2.96609 | 4.05E-56 | 4.55E-54 |
| AC083880. | 0.346472 | 0.912015 | 1.39632  | 4.60E-22 | 2.26E-21 |
| AC091057. | 0.216326 | 0.643815 | 1.573438 | 3.58E-36 | 4.57E-35 |
| AC009171. | 0.401345 | 0.914375 | 1.187943 | 4.64E-16 | 1.49E-15 |
| AC138904. | 0.11091  | 0.629532 | 2.504893 | 1.40E-37 | 2.14E-36 |
| AC040169. | 0.192147 | 0.411208 | 1.097659 | 8.60E-12 | 2.10E-11 |
| MAPT-IT1  | 0.081418 | 0.381833 | 2.229522 | 0.000791 | 0.001081 |
| LINC02195 | 0.058091 | 0.320369 | 2.463341 | 7.04E-17 | 2.38E-16 |
| LINC00092 | 0.583868 | 0.223841 | -1.38316 | 3.22E-41 | 6.63E-40 |
| RHPN1-AS1 | 0.88277  | 2.872387 | 1.70214  | 6.67E-45 | 1.79E-43 |
| AC011676. | 0.13382  | 0.300376 | 1.16648  | 3.76E-07 | 6.64E-07 |
| AC022509. | 1.729073 | 0.824539 | -1.06834 | 8.50E-28 | 6.37E-27 |
| AC022196. | 0.017885 | 0.572772 | 5.00114  | 7.02E-11 | 1.62E-10 |
| U62317.2  | 2.530317 | 5.211081 | 1.042265 | 1.12E-24 | 6.73E-24 |
| AL445423. | 0.855767 | 0.281786 | -1.60262 | 7.68E-35 | 8.71E-34 |
| AC120498. | 1.248652 | 5.986779 | 2.261408 | 1.69E-11 | 4.02E-11 |
| AC004988. | 0.080942 | 0.225895 | 1.4807   | 4.95E-25 | 3.08E-24 |
| NR4A1AS   | 2.324953 | 0.859259 | -1.43604 | 2.01E-28 | 1.55E-27 |
| AC092119. | 0.323817 | 0.697904 | 1.107849 | 3.31E-16 | 1.08E-15 |
| AL136084. | 2.322535 | 1.004593 | -1.20909 | 3.05E-31 | 2.85E-30 |
| AC048341. | 0.803213 | 0.383594 | -1.0662  | 1.91E-30 | 1.65E-29 |
| LINC01352 | 0.879113 | 0.262927 | -1.74139 | 2.02E-39 | 3.77E-38 |
| Z97989.1  | 1.147018 | 0.389827 | -1.55698 | 2.47E-53 | 1.46E-51 |

AL591686. 1. 980022 0. 087775 -4. 49556 2. 79E-62 1. 15E-59  
SCAT2 0. 273305 0. 656476 1. 264231 7. 92E-19 3. 09E-18  
AL117329. 0. 027215 0. 302556 3. 474719 7. 60E-18 2. 69E-17  
AC012073. 0. 374688 1. 113791 1. 571718 4. 15E-37 5. 97E-36  
AC020765. 0. 432664 0. 867202 1. 00312 4. 04E-10 8. 80E-10  
AL109741. 1. 665044 0. 45212 -1. 88078 5. 72E-46 1. 81E-44  
JARID2-AS 0. 123648 0. 266269 1. 106645 7. 23E-06 1. 18E-05  
MAFG-DT 1. 517914 4. 691141 1. 627849 3. 18E-41 6. 63E-40  
AL031846. 0. 654342 0. 323488 -1. 01633 4. 69E-27 3. 27E-26  
AL683807. 0. 162575 0. 502437 1. 627837 2. 69E-20 1. 18E-19  
AC083843. 2. 281715 0. 982894 -1. 21501 3. 46E-27 2. 46E-26  
AC023794. 0. 822187 0. 389788 -1. 07678 1. 43E-25 9. 05E-25  
AC024451. 0. 071682 0. 241576 1. 752799 1. 43E-10 3. 22E-10  
AL691482. 0. 68765 1. 474286 1. 10027 0. 000175 0. 000254  
AC079298. 0. 723433 0. 261759 -1. 46662 3. 08E-29 2. 45E-28  
AL121672. 0. 1924 0. 403674 1. 069081 0. 002716 0. 003522  
AP001189. 1. 756538 0. 870544 -1. 01275 3. 73E-20 1. 62E-19  
AC027698. 0. 042328 0. 262292 2. 631501 0. 00199 0. 002614  
AC124319. 0. 16686 0. 785423 2. 234835 2. 16E-25 1. 36E-24  
AL049838. 1. 798179 0. 814702 -1. 14219 1. 42E-38 2. 35E-37  
AC137630. 0. 16842 0. 353744 1. 070647 1. 47E-07 2. 67E-07  
AP005131. 0. 33336 1. 342833 2. 010126 1. 14E-24 6. 82E-24  
C9orf106 0. 093205 0. 293363 1. 654211 1. 37E-11 3. 29E-11  
LRRC8C-DT 0. 775683 0. 281926 -1. 46015 4. 68E-50 2. 07E-48  
AL157838. 0. 31253 0. 860841 1. 46175 1. 01E-18 3. 91E-18  
AC025175. 0. 999132 0. 489286 -1. 03 3. 91E-35 4. 52E-34  
TYMSOS 0. 314181 1. 352308 2. 105758 6. 59E-37 9. 22E-36  
LINC01589 1. 074876 0. 204131 -2. 39661 9. 55E-55 6. 22E-53  
AC073130. 0. 673057 0. 189823 -1. 82607 6. 33E-47 2. 24E-45  
SIAH2-AS1 0. 506665 1. 305482 1. 36548 5. 03E-09 1. 02E-08  
AL445426. 1. 996224 0. 165209 -3. 59491 2. 66E-61 6. 57E-59  
MIR3150BH 0. 035846 0. 226971 2. 66262 2. 69E-27 1. 95E-26  
AC010300. 0. 171882 0. 357082 1. 054832 0. 014841 0. 017775  
KIAA1671- 4. 042715 2. 007705 -1. 00978 4. 18E-20 1. 79E-19  
AL022341. 0. 350118 0. 771244 1. 139347 3. 55E-12 8. 90E-12  
AC068473. 0. 032891 0. 233785 2. 829427 2. 69E-33 2. 82E-32  
AC007998. 1. 061569 0. 360206 -1. 5593 5. 99E-32 5. 87E-31  
MAGI2-AS3 3. 963294 0. 913597 -2. 11707 2. 01E-62 1. 15E-59  
AP003071. 0. 92358 0. 20074 -2. 20191 2. 55E-52 1. 31E-50  
HSD11B1-A 11. 78852 0. 664666 -4. 14861 2. 56E-51 1. 26E-49  
SNHG25 0. 643237 2. 2572 1. 811112 2. 24E-24 1. 33E-23  
AL163051. 0. 264568 0. 557834 1. 076199 4. 23E-22 2. 09E-21  
LINC02693 1. 045174 0. 494867 -1. 07863 1. 57E-46 5. 26E-45  
LINC00337 0. 037201 0. 250147 2. 749379 2. 30E-44 5. 93E-43  
AP005131. 0. 112405 0. 453606 2. 012729 4. 94E-08 9. 46E-08  
AP001010. 0. 174472 0. 362708 1. 055814 2. 16E-08 4. 20E-08  
LNCOG 0. 841653 0. 243851 -1. 78723 7. 19E-41 1. 43E-39  
AC069234. 0. 583873 0. 270422 -1. 11044 1. 92E-30 1. 65E-29  
LINC02587 4. 114152 0. 348347 -3. 562 5. 94E-61 1. 22E-58  
AC107031. 0. 035419 0. 259188 2. 871398 8. 69E-09 1. 72E-08  
GNG12-AS1 0. 64799 0. 199674 -1. 69833 3. 03E-55 2. 15E-53

AL390294. 0. 444126 1. 836857 2. 048199 1. 44E-08 2. 83E-08  
AC087239. 0. 153712 0. 469927 1. 612204 2. 28E-18 8. 56E-18  
AP000941. 0. 511482 0. 22802 -1. 16552 9. 40E-31 8. 42E-30  
AL158847. 1. 030535 0. 35345 -1. 54382 7. 81E-17 2. 62E-16  
AC116025. 0. 016812 0. 238273 3. 825074 9. 81E-36 1. 19E-34  
AL136115. 0. 154496 0. 478734 1. 63165 0. 000946 0. 00128  
AP000695. 0. 341632 0. 807536 1. 241084 3. 33E-19 1. 36E-18  
LINC01354 0. 854864 0. 223375 -1. 93623 6. 49E-51 3. 08E-49  
AC022146. 0. 189299 0. 535937 1. 501397 5. 82E-08 1. 10E-07  
AL031985. 0. 883029 1. 922089 1. 122142 4. 25E-34 4. 73E-33  
AC092801. 0. 028972 0. 621986 4. 424138 1. 52E-13 4. 18E-13  
AC093278. 4. 463566 1. 538218 -1. 53694 5. 85E-45 1. 61E-43  
MIR210HG 0. 55279 1. 614969 1. 546702 3. 21E-21 1. 50E-20  
AC092718. 2. 127149 6. 036555 1. 504804 1. 06E-32 1. 07E-31  
LINC01711 0. 345254 0. 929091 1. 428161 2. 50E-20 1. 12E-19  
U73166. 1 0. 303303 0. 642571 1. 083094 6. 73E-10 1. 43E-09  
LINC02657 0. 064255 0. 355389 2. 46751 8. 08E-32 7. 86E-31  
MIR924HG 0. 228096 0. 549718 1. 269048 3. 34E-12 8. 41E-12  
AC104667. 0. 540956 1. 581505 1. 547714 1. 91E-29 1. 55E-28  
AC004687. 0. 388976 0. 829356 1. 092311 0. 000768 0. 001052  
AC109322. 0. 650874 1. 680513 1. 368452 1. 60E-22 8. 26E-22  
LINC01655 0. 059918 0. 250631 2. 064515 1. 47E-13 4. 08E-13  
AC009093. 0. 184104 0. 754594 2. 03518 6. 55E-36 8. 18E-35  
LINC01215 0. 117258 0. 261117 1. 155018 0. 041639 0. 047654  
AF178030. 0. 117953 2. 045965 4. 116497 2. 05E-07 3. 70E-07  
MIR22HG 11. 74398 4. 137019 -1. 50526 5. 49E-43 1. 26E-41  
AC093423. 0. 452915 0. 203666 -1. 15304 3. 32E-39 5. 95E-38  
AC092484. 0. 016412 0. 250204 3. 930267 1. 48E-14 4. 29E-14  
AL162171. 1. 041674 0. 442038 -1. 23666 2. 93E-36 3. 81E-35  
LINC02257 0. 069197 0. 291961 2. 077003 7. 49E-18 2. 67E-17  
AC005730. 0. 095476 0. 275451 1. 528584 1. 22E-07 2. 23E-07  
AGAP1-IT1 0. 168928 1. 105305 2. 709963 4. 40E-37 6. 25E-36  
AL358075. 0. 068647 0. 275137 2. 002894 2. 42E-18 9. 07E-18  
AC008966. 0. 650983 0. 281791 -1. 208 9. 16E-38 1. 43E-36  
TFAP2A-AS 0. 430215 0. 966685 1. 167987 1. 84E-22 9. 37E-22  
AC083906. 0. 210657 1. 197915 2. 507559 4. 02E-10 8. 78E-10  
LINC01402 0. 925346 0. 235364 -1. 9751 1. 25E-42 2. 76E-41  
AC010336. 0. 078937 0. 221303 1. 487244 4. 81E-14 1. 37E-13  
AL139393. 1. 275876 3. 059804 1. 261952 1. 64E-20 7. 38E-20  
AC022211. 0. 161771 0. 397034 1. 295313 5. 08E-13 1. 34E-12  
LINC01094 0. 665256 1. 46641 1. 140307 5. 24E-27 3. 64E-26  
AC092142. 0. 209562 0. 564667 1. 430025 1. 53E-08 3. 00E-08  
AC008115. 0. 949738 2. 189105 1. 204741 4. 41E-12 1. 10E-11  
POLH-AS1 0. 302067 0. 782922 1. 374002 1. 07E-36 1. 45E-35  
AL136115. 0. 179965 0. 463563 1. 36505 3. 89E-06 6. 47E-06  
HOXA-AS2 1. 057464 0. 362364 -1. 5451 3. 12E-49 1. 28E-47  
AP000553. 0. 159403 0. 604548 1. 923174 8. 53E-26 5. 46E-25  
ACTA2-AS1 5. 990954 0. 98026 -2. 61155 4. 16E-42 9. 02E-41  
RNF157-AS 0. 124982 0. 290473 1. 21669 7. 62E-11 1. 75E-10  
AC090825. 0. 73893 0. 303544 -1. 28353 1. 64E-34 1. 84E-33  
SIDT1-AS1 0. 124239 0. 288044 1. 213169 0. 02042 0. 024106

STPG3-AS1 0.192449 0.391805 1.02566 0.001856 0.002446  
AC048382. 0.974691 0.350157 -1.47694 9.27E-34 1.01E-32  
UBE2R2-AS 0.08573 0.220174 1.360769 0.000971 0.001313  
AC012213. 0.128876 0.316445 1.295972 3.57E-27 2.52E-26  
U47924.1 0.081288 0.306384 1.914232 1.70E-22 8.70E-22  
AC013652. 0.054015 0.506044 3.227842 6.36E-27 4.32E-26  
AC103706. 0.507255 1.802904 1.829539 1.20E-32 1.19E-31  
AC098869. 0.156919 0.3309 1.076373 4.63E-07 8.08E-07  
ZFH4-AS1 0.466436 0.226411 -1.04274 4.36E-21 2.00E-20  
MEG3 4.108826 1.487778 -1.46557 7.51E-44 1.86E-42  
LINC01485 1.9682 0.152284 -3.69204 1.04E-45 3.22E-44  
AC108134. 0.76447 2.058377 1.428975 1.06E-17 3.73E-17  
AL139220. 0.098843 0.275176 1.477151 2.32E-13 6.32E-13  
AP001434. 0.021326 0.488383 4.517322 8.19E-39 1.37E-37  
DDX11-AS1 0.160107 0.426592 1.413821 4.19E-31 3.90E-30  
AP000251. 0.166271 0.916884 2.463199 3.18E-37 4.68E-36  
LINC01351 0.070726 0.553716 2.968844 0.001729 0.002288  
LINC02528 0.024405 0.221371 3.181222 3.67E-19 1.48E-18  
HCG11 8.27157 3.437112 -1.26696 1.48E-49 6.29E-48  
THSD4-AS1 0.014133 0.308552 4.448342 0.0005 0.000694  
AC105219. 0.259396 1.026413 1.984381 2.40E-38 3.90E-37  
AP000695. 0.148534 0.410501 1.466596 3.12E-28 2.38E-27  
TMPO-AS1 0.304905 0.998126 1.710863 9.32E-48 3.49E-46  
MIR155HG 0.441706 0.938351 1.087041 2.51E-11 5.95E-11  
LIPE-AS1 1.085159 0.469421 -1.20895 1.91E-33 2.02E-32  
AL021368. 0.667604 0.248666 -1.42479 8.73E-45 2.30E-43  
LINC01703 0.65649 1.417516 1.110521 3.40E-14 9.79E-14  
SENCR 1.08391 0.439875 -1.30108 2.31E-35 2.74E-34  
AC073195. 0.247414 0.563632 1.187824 2.16E-21 1.02E-20  
LINC00665 2.956334 6.087296 1.041992 1.49E-31 1.44E-30  
AC020916. 21.16723 6.680958 -1.66371 1.81E-37 2.72E-36  
AL121832. 1.135383 2.645982 1.220624 9.97E-16 3.13E-15  
HLA-F-AS1 0.788944 0.381088 -1.0498 1.31E-37 2.02E-36  
LINC0258C 0.874103 0.190186 -2.20039 1.11E-55 8.57E-54  
RNF144A-A 0.14874 0.366624 1.301506 3.06E-17 1.05E-16  
AC121757. 1.520269 0.67789 -1.1652 7.52E-19 2.94E-18  
MMP2-AS1 0.149319 0.448845 1.587824 2.21E-16 7.21E-16  
AL445228. 0.234793 0.484251 1.044368 2.88E-08 5.58E-08  
AP001189. 0.8584 0.251667 -1.77013 9.58E-33 9.78E-32  
AC138696. 0.747957 2.429774 1.699795 1.78E-29 1.45E-28  
AP005131. 0.089224 0.781422 3.1306 4.62E-16 1.48E-15  
AL157373. 0.11013 0.259078 1.23418 0.000732 0.001005  
AC110792. 0.901747 0.439155 -1.03799 3.31E-29 2.63E-28  
AC002546. 6.261363 0.233315 -4.74613 1.13E-45 3.39E-44  
AC008764. 7.558064 3.615917 -1.06366 7.94E-36 9.72E-35  
AL356311. 0.49733 3.959292 2.992968 1.37E-07 2.51E-07
