# Supplementary material for: A Novel Prognostic Ferroptosis-Related lncRNA Signature Associated with Immune Landscape in Invasive Breast Cancer
Source: PubMed Central journal article supplement (PMC8961446; doi:10.1155/2022/9168556), 2022-03-20
Supplement: 9168556.f8.pdf [file 9168556.f8.pdf]

Table S3:ten ferroptosis-related lncRNAs risk model

| id        | coef     | HR       | HR.95L   | HR.95H   | pvalue   |
|-----------|----------|----------|----------|----------|----------|
| CYTOR     | 0.079688 | 1.08295  | 1.003118 | 1.169134 | 0.041385 |
| `LMNTD2-A | -0.13324 | 0.875252 | 0.753406 | 1.016803 | 0.08149  |
| AP005131. | -0.70568 | 0.493771 | 0.255518 | 0.954177 | 0.035771 |
| `LYPLAL1- | 0.103827 | 1.109408 | 1.008559 | 1.220342 | 0.032742 |
| `USP30-AS | -0.29405 | 0.745239 | 0.583062 | 0.952524 | 0.018853 |
| `RHPN1-AS | 0.142674 | 1.153354 | 1.053591 | 1.262563 | 0.001995 |
| AC004988. | 0.720037 | 2.05451  | 1.186141 | 3.558609 | 0.010199 |
| AC079298. | 0.644338 | 1.904726 | 1.11389  | 3.257039 | 0.018572 |
| `HSD11B1- | -0.22614 | 0.797608 | 0.594693 | 1.069758 | 0.131103 |
| LINC01655 | 0.480779 | 1.617334 | 0.952468 | 2.746308 | 0.075126 |
