# Supplementary material for: A Novel Prognostic Ferroptosis-Related lncRNA Signature Associated with Immune Landscape in Invasive Breast Cancer
Source: PubMed Central journal article supplement (PMC8961446; doi:10.1155/2022/9168556), 2022-03-20
Supplement: 9168556.f9.pdf [file 9168556.f9.pdf]

Table S4:Gene enrichment analysis for ferroptosis-related lncRNAs based on TCGA-B

| NAME                         | GS<br> foGS | DETAILSIZE | ES       | NES      | NOM p-val | FDR q-val | FWER p-val |
|------------------------------|-------------|------------|----------|----------|-----------|-----------|------------|
| KEGG_ADIPKEGG_ADIPDetails .  | 67          | -0.56504   | -2.11399 | 0        | 0.044548  | 0.033     |            |
| KEGG_GLYCKEGG_GLYCDetails .  | 77          | -0.5317    | -2.10386 | 0        | 0.026329  | 0.038     |            |
| KEGG_PRIMKEGG_PRIMDetails .  | 35          | -0.85153   | -2.0588  | 0        | 0.033204  | 0.059     |            |
| KEGG_ARACKEGG_ARACDetails .  | 58          | -0.5616    | -2.02064 | 0        | 0.036852  | 0.083     |            |
| KEGG_T_CEKEGG_T_CEDetails .  | 108         | -0.57887   | -2.01998 | 0.012048 | 0.029631  | 0.083     |            |
| KEGG_INTEKEGG_INTEDetails .  | 46          | -0.77359   | -2.0128  | 0.006369 | 0.026137  | 0.088     |            |
| KEGG_ETHEKEGG_ETHEDetails .  | 33          | -0.57757   | -2.01216 | 0.002058 | 0.022403  | 0.088     |            |
| KEGG_AUTCKEGG_AUTCDetails .  | 50          | -0.7015    | -1.97712 | 0.008114 | 0.029461  | 0.125     |            |
| KEGG_FC_EKEGG_FC_EDetails .  | 79          | -0.50823   | -1.97046 | 0.00611  | 0.028277  | 0.129     |            |
| KEGG_ASTHKEGG_ASTHDetails .  | 28          | -0.74548   | -1.94621 | 0.002119 | 0.032565  | 0.155     |            |
| KEGG_HEMAKEGG_HEMADetails .  | 85          | -0.59158   | -1.88377 | 0.020964 | 0.049745  | 0.221     |            |
| KEGG_TYPEKEGG_TYPEDetails .  | 41          | -0.73974   | -1.88186 | 0.012579 | 0.046101  | 0.221     |            |
| KEGG_VIRAKEGG_VIRADetails .  | 68          | -0.59141   | -1.87662 | 0.016227 | 0.043876  | 0.228     |            |
| KEGG_ALLCKEGG_ALLCDetails .  | 35          | -0.80601   | -1.85868 | 0.012146 | 0.047834  | 0.254     |            |
| KEGG_CYTCKEGG_CYTCDetails .  | 264         | -0.48531   | -1.8584  | 0.010799 | 0.044748  | 0.255     |            |
| KEGG_ANTIKEGG_ANTIDetails .  | 81          | -0.59615   | -1.8525  | 0.020325 | 0.04477   | 0.27      |            |
| KEGG_ALPHKEGG_ALPHDetails .  | 19          | -0.60031   | -1.8424  | 0.007737 | 0.045751  | 0.287     |            |
| KEGG_GNRHKEGG_GNRHDetails .  | 101         | -0.43918   | -1.81628 | 0        | 0.051646  | 0.311     |            |
| KEGG_GRAFKEGG_GRAFDetails .  | 37          | -0.77215   | -1.81575 | 0.028398 | 0.049228  | 0.312     |            |
| KEGG_CHEMKEGG_CHEMDetails .  | 188         | -0.49177   | -1.8131  | 0.025478 | 0.047751  | 0.317     |            |
| KEGG_VEGFKEGG_VEGFDetails .  | 76          | -0.45896   | -1.80355 | 0.010438 | 0.048795  | 0.335     |            |
| KEGG_JAK_KEGG_JAK_Details .  | 155         | -0.45833   | -1.8024  | 0.013043 | 0.047109  | 0.337     |            |
| KEGG_CYTCKEGG_CYTCDetails .  | 55          | -0.51211   | -1.79347 | 0.014523 | 0.048155  | 0.352     |            |
| KEGG_NOTCKEGG_NOTCDetails .  | 47          | -0.51599   | -1.79341 | 0.010776 | 0.046148  | 0.352     |            |
| KEGG_NATUKEGG_NATUDetails .  | 132         | -0.50862   | -1.79237 | 0.022222 | 0.044565  | 0.352     |            |
| KEGG_RIG_KEGG_RIG_Details .  | 71          | -0.46903   | -1.76593 | 0.016529 | 0.053151  | 0.389     |            |
| KEGG_LEISKEGG_LEISDetails .  | 70          | -0.59511   | -1.76273 | 0.039419 | 0.052761  | 0.398     |            |
| KEGG_PHOSKEGG_PHOSDetails .  | 76          | -0.47315   | -1.75927 | 0.01417  | 0.051911  | 0.4       |            |
| KEGG_APOPKEGG_APOPDetails .  | 87          | -0.46278   | -1.73207 | 0.025948 | 0.059642  | 0.43      |            |
| KEGG_BASEKEGG_BASEDetails .  | 35          | -0.59352   | -1.71252 | 0.041916 | 0.065694  | 0.462     |            |
| KEGG_MAPKKEGG_MAPKDetails .  | 267         | -0.39392   | -1.71163 | 0.010373 | 0.063823  | 0.464     |            |
| KEGG_LINCKEGG_LINCDetails .  | 29          | -0.52323   | -1.70466 | 0.013436 | 0.064769  | 0.475     |            |
| KEGG_CELLKEGG_CELLDetails .  | 131         | -0.4995    | -1.70062 | 0.068323 | 0.064191  | 0.479     |            |
| KEGG_NOD_KEGG_NOD_Details .  | 62          | -0.49562   | -1.68617 | 0.054326 | 0.068388  | 0.497     |            |
| KEGG_ABC_KEGG_ABC_Details .  | 44          | -0.47744   | -1.66096 | 0.034765 | 0.077479  | 0.539     |            |
| KEGG_PPARKEGG_PPARDetails .  | 69          | -0.47962   | -1.65123 | 0.010504 | 0.0794    | 0.552     |            |
| KEGG_NON_KEGG_NON_Details .  | 54          | -0.43897   | -1.58778 | 0.028398 | 0.109856  | 0.628     |            |
| KEGG_B_CEKEGG_B_CEDetails .  | 75          | -0.48463   | -1.58521 | 0.079592 | 0.108404  | 0.631     |            |
| KEGG_TOLLKEGG_TOLLDetails .  | 102         | -0.42291   | -1.58223 | 0.053061 | 0.107329  | 0.637     |            |
| KEGG_ACUTKEGG_ACUTDetails .  | 57          | -0.43025   | -1.56099 | 0.042194 | 0.116639  | 0.66      |            |
| KEGG_ENDCKEGG_ENDCDetails .  | 181         | -0.37754   | -1.54387 | 0.043033 | 0.124462  | 0.679     |            |
| KEGG_LONGKEGG_LONGDetails .  | 70          | -0.38816   | -1.53428 | 0.022495 | 0.128737  | 0.696     |            |
| KEGG_SNARKEGG_SNARDetails .  | 38          | -0.452     | -1.53308 | 0.05501  | 0.126646  | 0.697     |            |
| KEGG_FC_GKEGG_FC_GDetails .  | 96          | -0.40954   | -1.5167  | 0.06746  | 0.13518   | 0.714     |            |
| KEGG_GLYCKEGG_GLYCDetails .  | 49          | -0.39781   | -1.50046 | 0.050813 | 0.143865  | 0.735     |            |
| KEGG_TYPEKEGG_TYPEDetails .  | 47          | -0.39865   | -1.47711 | 0.06237  | 0.156917  | 0.757     |            |
| KEGG_NICCKEGG_NICCDetails .  | 24          | -0.45115   | -1.4731  | 0.081712 | 0.156857  | 0.763     |            |
| KEGG_FATIKKEGG_FATTDetails . | 42          | -0.43256   | -1.47033 | 0.089613 | 0.156014  | 0.766     |            |
| KEGG_INOSKEGG_INOSDetails .  | 54          | -0.41201   | -1.4675  | 0.100823 | 0.15453   | 0.768     |            |

|                               |     |          |          |          |          |       |
|-------------------------------|-----|----------|----------|----------|----------|-------|
| KEGG_PERCKEGG_PERCDetails .   | 78  | -0.42363 | -1.45223 | 0.081395 | 0.162307 | 0.784 |
| KEGG_SMALKEGG_SMALDetails .   | 84  | -0.37109 | -1.40893 | 0.100806 | 0.192833 | 0.825 |
| KEGG_VASCKEGG_VASCDetails .   | 114 | -0.34282 | -1.40829 | 0.093886 | 0.189761 | 0.826 |
| KEGG_GLYCKEGG_GLYCDetails .   | 21  | -0.47552 | -1.40381 | 0.109091 | 0.190172 | 0.834 |
| KEGG_LEUKKEGG_LEUKDetails .   | 116 | -0.37536 | -1.39925 | 0.135628 | 0.190858 | 0.838 |
| KEGG_INSUKEGG_INSUDetails .   | 137 | -0.33992 | -1.39074 | 0.070686 | 0.194001 | 0.845 |
| KEGG_SYSTKEGG_SYSTDDetails .  | 135 | -0.41596 | -1.35289 | 0.181308 | 0.224922 | 0.889 |
| KEGG_TYRCKEGG_TYRCDetails .   | 42  | -0.39421 | -1.33899 | 0.141649 | 0.234515 | 0.906 |
| KEGG_NITRKEGG_NITRDetails .   | 23  | -0.41977 | -1.33487 | 0.127745 | 0.234859 | 0.912 |
| KEGG_TASTKEGG_TASTDetails .   | 51  | -0.36602 | -1.32744 | 0.135729 | 0.238355 | 0.917 |
| KEGG_NEURKEGG_NEURDetails .   | 271 | -0.29396 | -1.32605 | 0.059794 | 0.235708 | 0.917 |
| KEGG_MTORKEGG_MTORDetails .   | 52  | -0.35387 | -1.31221 | 0.1417   | 0.244644 | 0.927 |
| KEGG_COLCKEGG_COLCDetails .   | 62  | -0.35391 | -1.30977 | 0.148515 | 0.243254 | 0.929 |
| KEGG_NUCLKEGG_NUCLDetails .   | 44  | -0.414   | -1.30005 | 0.193613 | 0.249265 | 0.942 |
| KEGG_OTHEKEGG_OTHEDetails .   | 16  | -0.5059  | -1.29749 | 0.193814 | 0.248107 | 0.942 |
| KEGG_AMYSKEGG_AMYSDetails .   | 53  | -0.34926 | -1.29688 | 0.143443 | 0.245112 | 0.943 |
| KEGG_CHRCKEGG_CHRCDetails .   | 73  | -0.34052 | -1.29353 | 0.155419 | 0.244347 | 0.944 |
| KEGG_PATHKEGG_PATHDetails .   | 325 | -0.29735 | -1.27641 | 0.143451 | 0.256539 | 0.955 |
| KEGG_NEURKEGG_NEURDetails .   | 126 | -0.32091 | -1.27257 | 0.15121  | 0.256402 | 0.957 |
| KEGG_TIGHKEGG_TIGHDetails .   | 132 | -0.31001 | -1.23989 | 0.193018 | 0.286685 | 0.968 |
| KEGG_PANTKEGG_PANTDetails .   | 16  | -0.4219  | -1.23873 | 0.191257 | 0.283742 | 0.968 |
| KEGG_SELEKEGG_SELEDetails .   | 26  | -0.38521 | -1.23313 | 0.211045 | 0.285876 | 0.971 |
| KEGG_GLYCKEGG_GLYCDetails .   | 31  | -0.36914 | -1.21727 | 0.221757 | 0.299189 | 0.979 |
| KEGG_ENDCKEGG_ENDCDetails .   | 52  | -0.33823 | -1.20712 | 0.234    | 0.306707 | 0.983 |
| KEGG_GLYCKEGG_GLYCDetails .   | 16  | -0.43338 | -1.19915 | 0.260355 | 0.311424 | 0.985 |
| KEGG_SPLIKEGG_SPLIDetails .   | 127 | -0.37389 | -1.1979  | 0.279749 | 0.308734 | 0.985 |
| KEGG_PURIKEGG_PURIDetails .   | 158 | -0.2799  | -1.17701 | 0.250996 | 0.329139 | 0.992 |
| KEGG_ALDCKEGG_ALDCDetails .   | 42  | -0.33739 | -1.16654 | 0.243461 | 0.336004 | 0.992 |
| KEGG_LYSIKEGG_LYSIDetails .   | 44  | -0.34818 | -1.16192 | 0.286869 | 0.336855 | 0.992 |
| KEGG_LYSCKEGG_LYSCDetails .   | 121 | -0.32714 | -1.14741 | 0.307087 | 0.349937 | 0.994 |
| KEGG_BLACKEGG_BLADDetails .   | 42  | -0.32394 | -1.14695 | 0.279612 | 0.345987 | 0.994 |
| KEGG_THYRKEGG_THYRDetails .   | 29  | -0.35092 | -1.14622 | 0.280488 | 0.34274  | 0.994 |
| KEGG_P53_KEGG_P53_Details .   | 68  | -0.31523 | -1.14489 | 0.283096 | 0.34     | 0.994 |
| KEGG_CALCKEGG_CALCDetails .   | 177 | -0.26401 | -1.13471 | 0.262729 | 0.34728  | 0.996 |
| KEGG_BASAKEGG_BASADetails .   | 55  | -0.30985 | -1.13459 | 0.310757 | 0.343298 | 0.996 |
| KEGG_LONGKEGG_LONGDetails .   | 70  | -0.28542 | -1.13309 | 0.287594 | 0.341027 | 0.996 |
| KEGG_GLICKEGG_GLICDetails .   | 65  | -0.28641 | -1.08436 | 0.331984 | 0.398331 | 0.998 |
| KEGG_TRYPKKEGG_TRYPDDetails . | 40  | -0.32488 | -1.08372 | 0.359667 | 0.394738 | 0.998 |
| KEGG_MELAKEGG_MELADetails .   | 101 | -0.27234 | -1.08037 | 0.338086 | 0.394488 | 0.998 |
| KEGG_PROGKEGG_PROGDetails .   | 85  | -0.28549 | -1.07709 | 0.354639 | 0.394275 | 0.998 |
| KEGG_ERBEKEGG_ERBEDetails .   | 87  | -0.27362 | -1.07262 | 0.373984 | 0.394989 | 0.998 |
| KEGG_PYRIKEGG_PYRIDetails .   | 97  | -0.29049 | -1.0432  | 0.398798 | 0.429759 | 1     |
| KEGG_PROXKEGG_PROXDDetails .  | 23  | -0.34346 | -1.04202 | 0.42     | 0.426792 | 1     |
| KEGG_MATUKEGG_MATUDetails .   | 25  | -0.35413 | -1.03831 | 0.405941 | 0.426818 | 1     |
| KEGG_HOMCKEGG_HOMCDetails .   | 28  | -0.35387 | -1.03603 | 0.413386 | 0.425506 | 1     |
| KEGG_REGUKEGG_REGUDetails .   | 35  | -0.3335  | -1.03382 | 0.413934 | 0.424087 | 1     |
| KEGG_VALIKEGG_VALIDetails .   | 44  | -0.33763 | -1.02202 | 0.436475 | 0.435642 | 1     |
| KEGG_HEDGKEGG_HEDGDetails .   | 56  | -0.2644  | -1.00716 | 0.421589 | 0.451471 | 1     |
| KEGG_HUNTKEGG_HUNTDetails .   | 180 | -0.28191 | -1.00207 | 0.441118 | 0.453766 | 1     |
| KEGG_PRICKEGG_PRICDetails .   | 35  | -0.32563 | -0.98906 | 0.481557 | 0.466748 | 1     |
| KEGG_PRIMKEGG_PRIMDetails .   | 16  | -0.33962 | -0.98478 | 0.469758 | 0.467767 | 1     |

|                   |                    |     |          |          |          |          |   |
|-------------------|--------------------|-----|----------|----------|----------|----------|---|
| KEGG_BUTA         | KEGG_BUTANOATE_MET | 34  | -0.30249 | -0.97738 | 0.458753 | 0.473104 | 1 |
| KEGG_GLYC         | KEGG_GLYCOSAMINOGL | 22  | -0.33972 | -0.9746  | 0.476483 | 0.472234 | 1 |
| KEGG_VASC         | KEGG_VASOPRESSIN_R | 44  | -0.28086 | -0.96475 | 0.501018 | 0.480658 | 1 |
| KEGG_PHEN         | KEGG_PHENYLALANINE | 18  | -0.3391  | -0.94892 | 0.512605 | 0.497607 | 1 |
| KEGG_RIBC         | KEGG_RIBOFLAVIN_ME | 16  | -0.31754 | -0.94498 | 0.526627 | 0.498102 | 1 |
| KEGG_GLYC         | KEGG_GLYCOSYLPHOSP | 25  | -0.32455 | -0.94015 | 0.510557 | 0.499967 | 1 |
| KEGG_ONE_KEGG_ONE | KEGG_ONE_CARBON_PC | 17  | -0.32659 | -0.90305 | 0.558468 | 0.548798 | 1 |
| KEGG_BETA         | KEGG_BETA_ALANINE_ | 22  | -0.26024 | -0.85126 | 0.656379 | 0.617154 | 1 |
| KEGG_PARK         | KEGG_PARKINSONS_DI | 128 | -0.27052 | -0.82242 | 0.612774 | 0.653916 | 1 |
| KEGG_RIBC         | KEGG_RIBOSOME      | 88  | -0.35043 | -0.78537 | 0.627409 | 0.701787 | 1 |
| KEGG_COMP         | KEGG_COMPLEMENT_AN | 69  | -0.27511 | -0.70454 | 0.83871  | 0.809062 | 1 |
| KEGG_OLFA         | KEGG_OLFACTORY_TRA | 385 | -0.23135 | -0.61531 | 0.99802  | 0.898843 | 1 |

RCA entire set.

RANK AT MLEADING EDGE

9370 tags=39%, list=17%, signal=46%  
6690 tags=30%, list=12%, signal=34%  
4094 tags=74%, list=7%, signal=80%  
5783 tags=28%, list=10%, signal=31%  
4223 tags=36%, list=7%, signal=39%  
6675 tags=65%, list=12%, signal=74%  
8327 tags=33%, list=15%, signal=39%  
3848 tags=50%, list=7%, signal=54%  
3338 tags=24%, list=6%, signal=26%  
3354 tags=54%, list=6%, signal=57%  
6334 tags=44%, list=11%, signal=49%  
3848 tags=59%, list=7%, signal=63%  
5212 tags=41%, list=9%, signal=45%  
3848 tags=74%, list=7%, signal=80%  
9025 tags=33%, list=16%, signal=39%  
6757 tags=47%, list=12%, signal=53%  
5783 tags=32%, list=10%, signal=35%  
3522 tags=20%, list=6%, signal=21%  
7962 tags=76%, list=14%, signal=88%  
9852 tags=38%, list=17%, signal=46%  
4062 tags=25%, list=7%, signal=27%  
8755 tags=29%, list=15%, signal=34%  
10816 tags=38%, list=19%, signal=47%  
7785 tags=36%, list=14%, signal=42%  
7962 tags=35%, list=14%, signal=40%  
9370 tags=32%, list=17%, signal=39%  
6486 tags=43%, list=11%, signal=48%  
9913 tags=34%, list=18%, signal=41%  
8154 tags=32%, list=14%, signal=38%  
6918 tags=37%, list=12%, signal=42%  
6819 tags=22%, list=12%, signal=25%  
5783 tags=21%, list=10%, signal=23%  
4112 tags=31%, list=7%, signal=33%  
8155 tags=40%, list=14%, signal=47%  
14028 tags=34%, list=25%, signal=45%  
6485 tags=22%, list=11%, signal=25%  
3731 tags=22%, list=7%, signal=24%  
9378 tags=41%, list=17%, signal=49%  
11970 tags=37%, list=21%, signal=47%  
9370 tags=32%, list=17%, signal=38%  
6461 tags=23%, list=11%, signal=26%  
7459 tags=21%, list=13%, signal=25%  
6632 tags=29%, list=12%, signal=33%  
2444 tags=17%, list=4%, signal=17%  
8125 tags=22%, list=14%, signal=26%  
14077 tags=40%, list=25%, signal=54%  
6788 tags=29%, list=12%, signal=33%  
10053 tags=29%, list=18%, signal=35%  
9913 tags=33%, list=18%, signal=40%

6555 tags=23%, list=12%, signal=26%  
6128 tags=24%, list=11%, signal=27%  
6740 tags=20%, list=12%, signal=23%  
3390 tags=19%, list=6%, signal=20%  
2203 tags=16%, list=4%, signal=16%  
9259 tags=26%, list=16%, signal=30%  
3354 tags=16%, list=6%, signal=16%  
7105 tags=21%, list=13%, signal=24%  
8405 tags=22%, list=15%, signal=26%  
19400 tags=41%, list=34%, signal=63%  
10918 tags=20%, list=19%, signal=25%  
7828 tags=23%, list=14%, signal=27%  
7828 tags=27%, list=14%, signal=32%  
12733 tags=36%, list=23%, signal=47%  
6604 tags=31%, list=12%, signal=35%  
7577 tags=25%, list=13%, signal=28%  
4515 tags=18%, list=8%, signal=19%  
6356 tags=18%, list=11%, signal=21%  
9537 tags=27%, list=17%, signal=32%  
8984 tags=22%, list=16%, signal=26%  
15417 tags=44%, list=27%, signal=60%  
4694 tags=15%, list=8%, signal=17%  
5621 tags=16%, list=10%, signal=18%  
7828 tags=25%, list=14%, signal=29%  
10365 tags=31%, list=18%, signal=38%  
6853 tags=20%, list=12%, signal=23%  
10312 tags=25%, list=18%, signal=30%  
8128 tags=21%, list=14%, signal=25%  
6677 tags=23%, list=12%, signal=26%  
8272 tags=25%, list=15%, signal=29%  
6356 tags=21%, list=11%, signal=24%  
5388 tags=24%, list=10%, signal=27%  
8302 tags=24%, list=15%, signal=28%  
10823 tags=23%, list=19%, signal=28%  
7111 tags=20%, list=13%, signal=23%  
7838 tags=17%, list=14%, signal=20%  
9259 tags=18%, list=16%, signal=22%  
8872 tags=25%, list=16%, signal=30%  
4288 tags=14%, list=8%, signal=15%  
8120 tags=21%, list=14%, signal=25%  
3645 tags=13%, list=6%, signal=13%  
12733 tags=32%, list=23%, signal=41%  
8559 tags=22%, list=15%, signal=26%  
9652 tags=20%, list=17%, signal=24%  
8498 tags=21%, list=15%, signal=25%  
14310 tags=29%, list=25%, signal=38%  
12599 tags=32%, list=22%, signal=41%  
6263 tags=16%, list=11%, signal=18%  
11539 tags=25%, list=20%, signal=31%  
5908 tags=20%, list=10%, signal=22%  
11879 tags=25%, list=21%, signal=32%

7534 tags=21%, list=13%, signal=24%  
5157 tags=23%, list=9%, signal=25%  
3522 tags=11%, list=6%, signal=12%  
9684 tags=22%, list=17%, signal=27%  
9269 tags=25%, list=16%, signal=30%  
13664 tags=32%, list=24%, signal=42%  
13421 tags=35%, list=24%, signal=46%  
13658 tags=32%, list=24%, signal=42%  
11574 tags=24%, list=20%, signal=30%  
14757 tags=40%, list=26%, signal=54%  
9682 tags=22%, list=17%, signal=26%  
34750 tags=70%, list=61%, signal=180%
